# Supplementary material for: Net-zero CO2 emissions scenarios for Switzerland
Source: Research Square preprint supplement (doi:10.21203/rs.3.rs-1874405/v1), 2022-08-11
Supplement: Supplementary file 1 [file 11159e416d59d883d9e00a4c.xlsx]

## Sheet: ReadMe
	This file contains main assumptions regarding the definition of the assessed scenarios
	Sheet	Description
	Scenario Policies	Lists the main policies (sectoral or overarching) of the two core scenarios BAU and CLI.
	Economic-Demographic	Main economic and demographic assumptions, common to all scenarios
	Residential Demand Drivers	Main drivers for the residential heating and electric demands, differentiated by scenario
	Services Demand Drivers	Main drivers for the heating and electric demands in the services and agriculture sectors, common to all scenarios
	Industry Demand Drivers	Main drivers for the heating and electric demands in the industrial sectors, common to all scenarios
	Transport Demand Drivers	Main drivers for the heating and electric demands in transport, common to all scenarios
	Import prices	Assumptions on the price of the imported energy carriers at the Swiss border, differentiated by scenario
	Import capacities	Assumptions on Net Transfer Capacities for cross-border electricty trade and on corridor limits for imported biofuels and e-fuels
	Resource Potentials	Domestic renewable resources sustainable potential, differentiated by scenario
	Technology cost and efficiency	Investment and operating costs, as well as efficiency assumptions for key technologies, differentiated by scenario
	Citation of the file:
	Panos, E., Kannan, R., Hirschberg, S., Kober, T. (2022). Net-zero CO2 emissions scenarios for Switzerland. Supplementary assumptions and data

## Sheet: Scenario Policies
		BAU scenario						CLI scenario
		2020	2030	2035	2040	2045	2050	2020	2030	2035	2040	2045	2050
	Nuclear Power	60 years lifetime						60 years lifetime
	Renewable energy targets (TWh/yr.)	No Targets						No Targets
	Hydropower	No Targets						No Targets
	Non-Hydro renewable energy	No Targets						No Targets
	Energy efficiency (% per capita from 2000)	No Targets						No Targets
	Final energy consumption	No Targets						No Targets
	Electricity consumption	No Targets						No Targets
	Emissions standards in buildings (kgCO2/sqm)	No Targets
	Existing buildings	No Targets							12		4		0
	New buildings	No Targets								0	0		0
	Emissions standards in vehicles (gCO2/km)	No Targets
	Private cars	No Targets						105	65				16
	Buses	No Targets						820-1160	575-810				400-570
	Light duty vehicles	No Targets						160	110				60
	Trucks	No Targets						680	475				330
	Emissions trading scheme linear reduction factors	No Targets							0.022		0.026		0.028
	CO2 emissions reduction target from 1990	No Targets							-0.45				0
	Import dependency	No Targets						No Targets
	Domestic grid reinforcement plans	SWISSGRID Grid 2025 Strategy						SWISSGRID Grid 2025 Strategy
	Climate correction factor for heating (index 2020=100)	100	97.8336		94.4404		89.9961	100	98.9647		97.5322		96.6518
	Cooling degree days	100	135.412		165.503		218.163	100	118.013		121.678		118.746

## Sheet: Economic-Demographic
	Common macroeconomic and demographic assumptions in all scenarios
		2020	2030	2040	2050
	Demographic
	Population (Million)	8.67726	9.41891	10.0028	10.4275
	Number of households (Million)	3.84925	4.23097	4.4972	4.66359
	Average household size	2.1747	2.14327	2.11172	2.09381
	Macro-economic
	GDP (BCHF2010)	725.25	820.322	922.114	1022.87
	Gross Value Added (index 2020=100)	100	114.226	128.027	141.097
	Industry	100	115.428	127.725	140.571
	Services	100	113.808	128.132	141.279
	Production index in industry (2020=100)	100	108.451	116.384	124.243

## Sheet: Residential Demand Drivers
	Energy reference area (ERA) in million m2
		2015	2020	2030	2040	2050
	Space heating area	475.324	506.72	561.14	601.441	632.197
	Single family houses before 1990	156.703	155.049	150.164	142.521	132.481
	Single family houses after 1990	59.1664	66.6141	80.1407	90.8781	102.679
	Multi family houses before 1990	186.033	187.002	186.709	185.538	181.164
	Multi family houses after 1990	73.4207	98.055	144.126	182.503	215.874
	Air conditioning area	11.2384	16.749	69.2451	191.855	366.916
	Buildings before 2015	11.2384	15.7586	59.5311	155.177	282.156
	Buildings after 2015	0	0.990425	9.71401	36.6779	84.7603
	Lighting area	512.541	551.899	609.328	649.338	681.632
	All residential buildings	512.541	551.899	609.328	649.338	681.632
	Electrical appliances (in thousands)
		2015	2020	2025	2030	2035	2040	2045	2050
	Dishwashers	2498.5	2736.86	3021.66	3301.84	3530.54	3684.79	3815.04	3941.59
	Fridges	3322.98	3428.82	3428.82	3428.82	3428.82	3428.82	3428.82	3428.82
	Fridge-freezer combination	1297.7	1441.18	1441.18	1441.18	1441.18	1441.18	1441.18	1441.18
	Freezers	2475.87	2517.51	2646.06	2766.32	2857.25	2935.74	2968.1	2999.1
	Washing machines	3586.9	3794.26	4030.2	4185.38	4323.42	4410.4	4470.74	4534.53
	Washer-dryers	104.629	130.124	165.466	200.796	226.753	250.643	275.159	297.839
	Cloths dryers	2745.78	3007.76	3247.01	3468.21	3666.85	3841.61	4001.85	4162.81
	TV	4269.04	4309.12	4686.27	4939.44	5145.24	5288.83	5397.18	5506.13
	Video	2129.37	826.294	808.722	422.754	0.0438575	0.00449267	0.00045745	4.65392e-05
	Computer	7976.82	8844.96	9810.73	10881.8	11535.6	12214.2	12771.8	13190.4
	Mobile- and smartphones	9739	10627	11806.1	13086.7	14075	14844.2	15414	15937.7
	Cooking ovens	3443.88	3630.56	3837.54	4012.55	4163.08	4265.02	4343.21	4422.83
	Energy Service Demands in PJ/yr.
		BAU					CLI
		2015	2020	2030	2040	2050	2015	2020	2030	2040	2050
	Space heating	141.717	142.645	145.152	142.074	134.374	141.717	142.645	146.83	146.725	144.312
	Single family houses before 1990	51.9057	50.209	47.4896	43.4444	38.4114	51.9057	50.209	48.0387	44.8667	41.2522
	Single family houses after 1990	16.1844	17.0648	18.6767	19.0946	18.9784	16.1844	17.0648	18.8926	19.7198	20.382
	Multi family houses before 1990	57.5947	56.6146	55.2987	53.0326	49.3023	57.5947	56.6146	55.938	54.7688	52.9484
	Multi family houses after 1990	16.0325	18.7563	23.6868	26.5019	27.6823	16.0325	18.7563	23.9607	27.3696	29.7295
	Water heating	23.3728	25.5645	26.6754	27.2684	27.3823	23.3728	25.5645	26.8263	27.6971	28.3305
	All residential buildings	23.3728	25.5645	26.6754	27.2684	27.3823	23.3728	25.5645	26.8263	27.6971	28.3305
	Air conditioning demand	0.657982	1.07244	5.41644	15.5845	32.5833	0.657982	1.07244	4.72048	11.4577	17.735
	All residential buildings	0.657982	1.07244	5.41644	15.5845	32.5833	0.657982	1.07244	4.72048	11.4577	17.735
	Notes
	1. The year 2020 values are provisional based on statistics available at the time of the study
	2. The estimations of all Energy Reference Areas (ERA) presented above are the same across all scenarios and do not include second houses and holiday houses, except for lighting area in which all houses are included
	3. The stock of electrical appliances is the same across all scenarios
	4. The energy service demand for space and watr heating accounts for correction for climate change impacts. In BAU the RCP8.5 scenario is used for the climate change impacts, while in CLI the RCP2.6 scenario. The higher temperature increase in BAU leads to lower energy service demand for heating compared to CLI.
	5. The energy service demands reported for the CLI scenario are also the same for ANTI, SECUR, MARKETS, INNOV and LC scenarios as well
	6. The energy service demand for air conditioning accounts for correction for climate change impacts. In BAU the RCP8.5 scenario is used for the climate change impacts, while in CLI the RCP2.6 scenario. The higher temperature increase in BAU leads to higher energy service demand for cooling compared to CLI.

## Sheet: Services Demand Drivers
	Sectoral gross value added in BCHF2010
		2015	2020	2030	2040	2050
	Agriculture & Forestry	4.31468	4.20969	3.76708	3.78364	3.91645
	Trade and commerce	93.3395	94.1958	118.167	137.436	151.425
	Financing & Insurance	62.8334	64.0805	78.6616	100.154	126.626
	Health services	50.3127	56.2019	68.1644	80.1907	90.1062
	Education services	3.8526	4.05708	4.21361	4.35657	4.50614
	Accomodation & Restaurants	11.0348	10.8261	10.1589	9.94685	10.1525
	Other services	250.273	270.906	291.004	310.528	325.989
	Total	475.961	504.477	574.136	646.395	712.721
	Energy reference area (ERA) in million m2
		2015	2020	2030	2040	2050
	Pre-2015 buildings	159.254	159.254	159.254	159.254	159.254
	Post-2015 buildings	0	8.85742	22.839	33.9257	42.3369
	Total	159.254	168.111	182.093	193.18	201.591
	Notes
	1. The year 2020 values are provisional based on statistics available at the time of the study
	2. The estimations of all Energy Reference Areas (ERA) presented above are the same across all scenarios, and exclude non-used area

## Sheet: Industry Demand Drivers
	Sectoral gross value added in BCHF2010
		2015	2020	2030	2040	2050
	Food	11.5563	13.3187	11.6689	11.0534	10.9985
	Textile	1.18881	1.12641	0.959137	0.77243	0.59212
	Pulp and Paper	0.86928	0.804954	0.672692	0.612447	0.654367
	Chemicals & pharma	36.69	44.6374	62.2184	79.8923	101.163
	Non metalic minerals	2.54096	2.40219	2.2357	2.2418	2.41075
	Basic metals	1.60607	1.66281	1.50373	1.33917	1.2159
	Metal tools & products	8.70347	8.04508	8.17796	7.9651	7.86808
	Machinery	14.6036	14.4397	16.9176	17.2002	16.5423
	Electrical equipment	27.3988	27.913	30.622	31.2133	30.5708
	Construction	35.2084	36.3576	38.882	41.4253	43.6724
	Energy industries	12.346	10.8529	13.8841	16.164	17.9087
	Other industries	13.9629	13.8615	14.7438	14.1785	12.9958
	Total	166.675	175.422	202.486	224.058	246.593
	Energy reference area (ERA) in million m2
		2015	2020	2030	2040	2050
	Production area	62.7086	65.5702	69.1143	72.1837	74.939
	Food	7.76166	8.09465	8.00146	7.88989	7.88666
	Textile	1.63481	1.4457	1.21105	1.03926	0.958871
	Pulp and Paper	1.72657	1.73132	1.81447	1.88155	1.98134
	Chemicals & pharma	4.66383	4.91085	5.67653	6.29965	6.72117
	Non metalic minerals	2.39487	2.35802	2.20081	2.1279	2.18717
	Basic metals	0.760057	0.761413	0.804621	0.79708	0.764412
	Metal tools & products	5.5294	5.63772	5.09215	4.62152	4.18196
	Machinery	8.8918	9.23248	10.1046	10.4228	10.3395
	Electrical equipment	14.2504	15.4868	16.8703	18.1777	19.308
	Construction	3.87981	4.19931	4.73329	5.51138	6.42046
	Energy industries	1.25045	1.26584	1.37165	1.55834	1.87545
	Other industries	9.96486	10.446	11.2334	11.8567	12.314
	Office area	12.0579	12.0757	12.3243	12.1992	12.0007
	Food	0.650458	0.607143	0.677299	0.700485	0.686166
	Textile	0.221237	0.223306	0.214934	0.202466	0.194161
	Pulp and Paper	0.140185	0.134788	0.128273	0.115021	0.108894
	Chemicals & pharma	1.19387	1.21484	1.29182	1.34804	1.40038
	Non metalic minerals	0.181476	0.168854	0.159034	0.151294	0.151588
	Basic metals	0.175359	0.162493	0.158887	0.136571	0.11045
	Metal tools & products	1.09599	1.11045	1.01619	0.922458	0.832433
	Machinery	1.88816	1.90289	1.98905	2.01496	2.01323
	Electrical equipment	2.09054	2.09864	2.10594	1.9907	1.89228
	Construction	2.36683	2.38643	2.4728	2.51345	2.54316
	Energy industries	0.444514	0.446937	0.442399	0.422693	0.382223
	Other industries	1.60932	1.61894	1.6677	1.68108	1.68571
	Production index 2010=100
		2015	2020	2030	2040	2050
	Food	106.5	107.494	93.4688	84.158	79.7267
	Textile	100	97.8286	79.8045	59.997	43.158
	Pulp and Paper	99	93.7978	81.6119	66.3922	58.064
	Chemicals & pharma	102	108.394	122.455	137.831	152.98
	Non metalic minerals	98	92.7988	80.7442	75.7512	77.7049
	Basic metals	102	101.35	95.2607	82.0904	71.1153
	Metal tools & products	102.5	94.0297	90.3527	84.6592	80.3868
	Machinery	108	107.113	129.49	131.929	123.041
	Electrical equipment	110	120.615	131.103	139.651	144.466
	Construction	105	108.729	114.875	121.165	126.997
	Energy industries	103.5	101.002	117.303	135.911	153.302
	Other industries	102	100.678	103.971	95.9216	80.8557
	Notes
	1. The year 2020 values are provisional based on statistics available at the time of the study
	2. The estimations of all Energy Reference Areas (ERA) presented above are the same across all scenarios, and exclude non-used area

## Sheet: Transport Demand Drivers
	Billion vehicle kilometers by mode of transport
		2015	2020	2030	2040	2050
	Passenger transport	58.9404	62.088	63.252	64.2775	65.2302
	Private cars	56.62	59.5708	60.5376	61.5044	62.4004
	Buses, Trams and Troleys	0.33268	0.419514	0.526113	0.56046	0.578829
	Two-wheelers	1.79359	1.87307	1.94454	1.95309	1.98592
	Rail	0.1941	0.224639	0.243726	0.25957	0.265066
	Freight transport	6.39217	6.90187	7.18453	7.92307	8.47857
	Light duty vehicles	4.12909	4.37698	4.44145	4.953	5.33645
	Heavy duty trucks	2.23458	2.4839	2.69637	2.92144	3.0916
	Rail	0.0285	0.0409933	0.0467133	0.04862	0.0505267
	Billion passenger and ton kilometers by mode of transport
		2015	2020	2030	2040	2050
	Passenger transport	118.902	128.907	134.6	139.179	141.914
	Private cars	91.9161	97.2584	99.3704	101.499	103.133
	Buses, Trams and Troleys	4.3968	5.49541	6.94246	7.6712	8.14584
	Two-wheelers	1.79359	1.87307	1.94454	1.95309	1.98592
	Rail	20.7956	24.2797	26.3427	28.0551	28.6491
	Freight transport	27.9546	29.987	33.365	36.587	39.112
	Light duty vehicles	0.945908	1.05577	1.18644	1.32477	1.44591
	Heavy duty trucks	16.2677	17.7612	19.4156	21.0772	22.3491
	Rail	10.741	11.17	12.763	14.185	15.317
	Notes
	1. The year 2020 values are provisional based on statistics available at the time of the study

## Sheet: Import prices
	Import prices (CHF2010/GJ)
		BAU				CLI
		2020	2030	2040	2050	2020	2030	2040	2050
	Crude oil	8.79467	18.5001	20.6668	22.8335	8.79467	11.0001	10.6667	10.3334
	Natural gas	3.09197	9.27293	10.3533	10.9835	3.09197	7.38233	6.93219	6.48205
	Diesel from non-fossil sources1	42.744	49.6873	52.426	55.0203	42.744	56.3617	65.6826	70.8104
	Ethanol / gasoline from non-fossil sources1	30.3511	39.3715	41.901	44.3168	30.3511	48.1776	59.1573	64.0598
	Methane from non-fossil sources1	17	19.08	22.26	24.38	17	20.575	24.15	27.445
	Electricity2	16.7352	21.1604	20.3271	18.0395	16.7352	27.7275	27.7474	28.9111
	Hydrogen	26.9167	40.0568	42.7397	44.6874	26.9167	41.644	44.3974	52.1045
	Notes
	1. Price refers to liquids or gases either of biogenic source or via PtX with CCS
	2. Electricity prices are reported as average accross neigbouring countries and accross the hours of a year
	2. The CLI import prices are also the same for ANTI, SECUR, MARKETS, INNOV and LC scenarios

## Sheet: Import capacities
	Net Transfer Capacities (NTCs) for electricity trade in GW
			BAU	CLI	ANTI	MARKETS & INNOV
	From - To	2030	2050	2050	2050	2050
	Switzerland - Germany	5.6	6.5	6.5	1.68	10.4
	Switzerland - France	1.3	2.8	3.8	0.39	7.3
	Switzerland - Italy	6	6	6	1.8	7.2
	Switzerland - Austria	1.7	1.7	1.7	0.51	2.3
	Germany - Switzerland	3.3	4.1	4.1	0.99	8
	France - Switzerland	3.7	5.2	6.2	1.11	9.7
	Italy - Switzerland	3	3.7	3.7	0.9	4.9
	Austria - Switzerland	1.7	1.7	1.7	0.51	2.3
	Biofuels and e-fuels import corridors limits PJ/yr.
	Scenario	max limit
	BAU, CLI, LC	98.0427
	ANTI	82.5492
	MARKETS, INNOV	no limit
	Notes
	1. The NTC of CLI scenario is also used in LC scenarios
	2. The SECUR scenario imposes the constraint of zero import dependency, so the cross-border capacities and corridors values do not play a role
	3. The ANTI scenario assumes a failure of the Swiss-EU electricity market agreements that limits imported capacities to 30% from their current levels
	4. MARKETS and INNOV remove congestion in cross-border electricty trade, by increasing NTCs, that allows for 2x more electricity imports than CLI
	5. The corridor limit for biofuels and e-fuels in BAU is set to be equivalent to avoided oil consumption in transport that achieves a reduction of 7.2 Mt CO2/yr., maintaining in this way the domestic/interantional mitigation ratio foressen in the Swiss NDC submission.
	6. The corridor limit in ANTI is set to the lowest value that gurantees feasibility of the scenario

## Sheet: Resource Potentials
	Renewable Resources sustainable potential (TWh - electric or thermal)
		Reference		Low		High
		2030	2050	2030	2050	2030	2050
	Hydropower	37.4	37.6
	Wind	4.3	4.3	1.7	1.7
	Deep geothermal	4.4	4.4	0	0
	Solar PV*	50	50	20	20
	Solar thermal*	12.5484	12.7498	11.8573	11.8573
	Heat from waste water**	5.8	5.8
	Forest wood	6.81721	9.56041	5.57905	6.12521	6.81721	9.56041
	Wood from landscape	0.880067	1.18324	0.880067	1.18324	0.880067	1.18324
	Wood residues	2.08657	2.11572	2.08657	2.11572	2.08657	2.11572
	Waste wood	3.45867	4.34633	3.3082	3.96197	3.61477	4.7392
	Manure	2.90946	7.5
	Green waste	1.76627	3.04342
	Sewage sludge	1.5394	1.6586
	Mixed fossil waste	16.6262	17.2284
	of which industrial (non renewable)	3.00376	2.98297
	of which municipal (renewable)	6.81121	7.12271
	of which municipal (non renewable)	6.81121	7.12271
	Notes:
	* The potential considers roof top panels and there is also the additional constraint of the available roof top area
	** Produced by centralised heat pumps using waste water as a heat source
	1. The Reference values are used for BAU, CLI, and LC scenarios
	2. The Low values are used in ANTI scenario. Where no low value is indicated, the reference value holds
	3. The High values are used in SECUR, MARKETS and INNOV scenarios. Where no high value is indicated, the reference value holds
	4. In Low and High potentials empty cells imply that the Reference values are used

[truncated: 1 more sheets: Technology cost and efficiency]
