# Supplementary material for: Net-zero CO2 emissions scenarios for Switzerland
Source: Research Square preprint supplement (doi:10.21203/rs.3.rs-1874405/v1), 2022-08-11
Supplement: Supplementary file 2 [file e015abab1208ce0ba3824482.xlsx]

## Sheet: Scenario_results
		BAU				CLI				ANTI				SECUR				MARKETS				INNOV				LC				CLI_NUC50
	2019	2030	2040	2050	CAGR %	2030	2040	2050	CAGR %	2030	2040	2050	CAGR %	2030	2040	2050	CAGR %	2030	2040	2050	CAGR %	2030	2040	2050	CAGR %	2030	2040	2050	CAGR %	2030	2040	2050	CAGR %
ECONOMIC AND DEMOGRAPHIC ASSUMPTIONS
Population (million)	8.6039	9.41891	10.0028	10.4275	0.00622012	9.41891	10.0028	10.4275	0.00622012	9.41891	10.0028	10.4275	0.00622012	9.41891	10.0028	10.4275	0.00622012	9.41891	10.0028	10.4275	0.00622012	9.41891	10.0028	10.4275	0.00622012	9.41891	10.0028	10.4275	0.00622012	9.41891	10.0028	10.4275	0.00622012
Gross Domestic Product (BCHF2010)	709.91	820.322	922.114	1022.87	0.0118511	820.322	922.114	1022.87	0.0118511	820.322	922.114	1022.87	0.0118511	820.322	922.114	1022.87	0.0118511	820.322	922.114	1022.87	0.0118511	820.322	922.114	1022.87	0.0118511	820.322	922.114	1022.87	0.0118511	820.322	922.114	1022.87	0.0118511
Gross Value Added Industry (BCHF2010)	176.923	202.486	224.058	246.593	0.010768	202.486	224.058	246.593	0.010768	202.486	224.058	246.593	0.010768	202.486	224.058	246.593	0.010768	202.486	224.058	246.593	0.010768	202.486	224.058	246.593	0.010768	202.486	224.058	246.593	0.010768	202.486	224.058	246.593	0.010768
Gross Value Added Services (BCHF2010)	515.685	574.136	646.395	712.721	0.0104932	574.136	646.395	712.721	0.0104932	574.136	646.395	712.721	0.0104932	574.136	646.395	712.721	0.0104932	574.136	646.395	712.721	0.0104932	574.136	646.395	712.721	0.0104932	574.136	646.395	712.721	0.0104932	574.136	646.395	712.721	0.0104932
Energy Reference Area Industry14	76.9612	81.4386	84.3829	86.9397	0.0039404	81.4386	84.3829	86.9397	0.0039404	81.4386	84.3829	86.9397	0.0039404	81.4386	84.3829	86.9397	0.0039404	81.4386	84.3829	86.9397	0.0039404	81.4386	84.3829	86.9397	0.0039404	81.4386	84.3829	86.9397	0.0039404	81.4386	84.3829	86.9397	0.0039404
Energy Reference Area Services	166.322	182.093	193.18	201.591	0.00622299	182.093	193.18	201.591	0.00622299	182.093	193.18	201.591	0.00622299	182.093	193.18	201.591	0.00622299	182.093	193.18	201.591	0.00622299	182.093	193.18	201.591	0.00622299	182.093	193.18	201.591	0.00622299	182.093	193.18	201.591	0.00622299
Energy Reference Area Residential15	506.72	561.14	601.441	632.197	0.0071624	561.14	601.441	632.197	0.0071624	561.14	601.441	632.197	0.0071624	561.14	601.441	632.197	0.0071624	561.14	601.441	632.197	0.0071624	561.14	601.441	632.197	0.0071624	561.14	601.441	632.197	0.0071624	561.14	601.441	632.197	0.0071624
UPSTREAM SECTOR
Domestic Production (PJ/yr.)	285.685	321.578	347.298	375.675	0.00887255	384.517	458.241	544.827	0.021366	339.694	410.061	456.459	0.0152313	417.683	513.886	734.963	0.0316986	399.829	473.838	541.897	0.0211897	383.16	449.869	523.852	0.0200907	377.547	443.025	532.543	0.0205814	392.759	472.446	547.861	0.0215435
Woody biomass	42.33	42.4786	42.4786	42.4786	0.000113051	49.3049	54.948	61.9406	0.0123557	42.6762	44.5118	48.2334	0.00422032	49.9365	56.0338	63.3549	0.0130932	49.9365	56.0338	63.3549	0.0130932	49.9365	56.0338	63.3549	0.0130932	49.3049	54.948	61.9406	0.0123557	49.3049	54.948	61.9405	0.0123557
Waste (incl. non renewable waste)1	68.3308	68.5474	69.4443	70.5348	0.00102457	71.3724	75.0682	78.629	0.00588691	66.1979	68.9407	70.8306	0.00172237	72.8517	76.7061	78.6289	0.00586388	71.3096	75.0682	78.6289	0.00589295	68.5474	72.5373	78.6289	0.00596133	68.5474	69.4444	78.629	0.00574472	71.6147	75.0682	78.6289	0.00586389
Manure	0	2.84953	5.78398	8.29736	-	17.1067	21.5822	27	-	6.56618	21.583	27.0014	-	17.1067	21.5822	27	-	17.1067	21.5822	27	-	13.8492	14.3882	27	-	11.4051	14.0362	27	-	17.1067	21.5822	27	-
Hydro (incl. pump)	146	147.556	147.808	151.118	0.00111201	150.245	151.389	151.992	0.00129824	149.26	151.191	151.609	0.00121687	150.461	153.394	157.486	0.00244587	150.353	152.287	152.803	0.00147012	150.224	151.289	151.76	0.00124899	150.246	151.382	151.98	0.00129584	150.346	151.448	152.026	0.00130554
Solar	10.482	19.6488	31.5171	49.2094	0.0511499	36.2265	66.0054	106.062	0.0775144	30.6744	57.2494	82.6796	0.0688925	69.6771	124.639	186.402	0.0972934	50.9961	87.0857	123.793	0.0829011	38.3001	73.0468	106.594	0.0776884	34.2339	63.8947	101.635	0.0760336	45.2604	76.5502	111.122	0.0791357
Wind	0.525	0.260711	0.424673	0.691748	0.00893723	1.77237	7.17024	15.48	0.115339	1.6362	3.75937	6.12223	0.0824586	2.28113	9.22844	15.48	0.115339	0.260709	0.424667	0.691739	0.00893679	0.265011	0.431677	0.703157	0.00946978	1.77238	7.17024	15.48	0.115339	2.28113	9.22844	15.48	0.115339
Deep geothermal	0	0	8.62079e-05	8.73068e-05	-	0	0.0032407	5.47721	-	0	0	0	-	0	1.4785	120.651	-	0	0	0	-	0	1.07572e-06	1.08455e-06	-	0	0.00552606	0.0666121	-	0	3.20709	3.2071	-
Environmental heat	18.017	40.2372	49.8415	53.3455	0.0356355	58.489	82.0741	98.2467	0.0562396	42.6839	62.8255	69.9823	0.0447439	55.3698	70.8244	85.9602	0.0593165	59.8664	81.3559	95.6252	0.0553185	62.0374	82.1429	95.8105	0.0553844	62.0374	82.1429	95.8105	0.0553844	56.8448	80.4136	98.4555	0.0563119
Net Imports (PJ/yr.)	753.1	613.559	472.892	363.177	-0.0232515	506.358	289.003	112.752	-0.0594198	497.331	287.305	120.284	-0.0574556	410.205	195.284	4.15764	-0.154408	493.607	283.34	130.757	-0.054914	506.098	285.807	128.402	-0.0554679	507.25	290.764	113.1	-0.0593263	419.242	208.823	112.634	-0.0594515
Coal	3.35	3.40719	2.89066	2.355	-0.0113039	1.90702	1.02407	0.201775	-0.0866453	1.94306	0.9795	0.189585	-0.0884795	1.90701	0.978799	0.190794	-0.0882926	1.90701	1.02477	0.201797	-0.0866422	1.907	1.02461	0.201467	-0.0866904	1.90702	0.984149	0.189606	-0.0884763	1.90701	1.02421	0.201802	-0.0866414
Crude oil and oil products2	366.52	243.007	173.459	122.846	-0.0346475	185.227	84.1713	0	-1	179.692	52.418	0.00883352	-0.290368	143.747	57.5413	0	-1	185.697	86.6309	0	-1	185.326	85.9691	0	-1	183.202	81.2128	2.01516	-0.154519	186.488	80.6847	0	-1
Natural gas	122.61	150.689	175.399	201.254	0.0161142	94.1726	78.4413	58.7392	-0.0234592	104.298	95.9963	61.5573	-0.0219819	57.5925	51.2465	0	-1	93.5582	75.2482	46.2285	-0.0309751	94.0198	76.0877	44.6105	-0.032088	96.7691	82.2962	56.1222	-0.0248939	92.5189	83.0014	58.7391	-0.0234593
Uranium	275.78	205.36	84.422	0	-1	205.36	84.422	0	-1	205.327	84.4222	0	-1	205.287	84.422	0	-1	205.36	84.422	0	-1	205.36	84.422	0	-1	205.36	84.422	0	-1	98.8032	0	0	-1
Biofuels/e-fuels (liquids or gases)	7.37	4.2732	4.2732	4.2732	-0.0174287	12.0676	18.0493	37.3973	0.0537897	10.9612	52.0344	58.1822	0.0689217	6.76711	6.88931	10.6132	0.0118332	12.0981	21.6207	51.8143	0.0649323	12.0085	19.3743	49.042	0.063045	12.1695	21.0855	38.4998	0.0547778	10.2148	18.4135	37.3973	0.0537897
Electricity	-22.53	6.82176	32.449	32.449	-2.01184	7.62366	22.0718	15.5906	-1.98819	-4.89041	1.45444	0.346393	-1.874	-5.09546	-5.79754	-6.64979	-0.0385986	-5.01305	12.4509	30.5699	-2.00989	7.47655	18.5553	34.1741	-2.01353	7.84244	18.821	14.331	-1.98551	29.3107	25.1995	15.7968	-1.98861
Hydrogen	0	0	0	4.59263e-08	-	0	0.822811	0.82281	-	0	0	0	-	0	0.00348828	0.00348829	-	0	1.94225	1.94225	-	0	0.373677	0.373677	-	0	1.94225	1.94225	-	0	0.499215	0.499214	-
Primary energy consumption (PJ/yr.)	1038.78	935.137	820.19	738.852	-0.0109304	890.875	747.243	657.579	-0.0145562	837.025	697.366	576.743	-0.018766	827.889	709.17	739.12	-0.0107232	893.436	757.177	672.653	-0.0138351	889.257	735.676	652.253	-0.0148101	884.797	733.788	645.642	-0.0151472	812.001	681.268	660.495	-0.014417
Coal	3.35	3.40719	2.89066	2.355	-0.0113039	1.90702	1.02407	0.201775	-0.0866453	1.94306	0.9795	0.189585	-0.0884795	1.90701	0.978799	0.190794	-0.0882926	1.90701	1.02477	0.201797	-0.0866422	1.907	1.02461	0.201467	-0.0866904	1.90702	0.984149	0.189606	-0.0884763	1.90701	1.02421	0.201802	-0.0866414
Crude oil and oil products2	366.52	243.007	173.459	122.846	-0.0346475	185.227	84.1713	0	-1	179.692	52.418	0.00883352	-0.290368	143.747	57.5413	0	-1	185.697	86.6309	0	-1	185.326	85.9691	0	-1	183.202	81.2128	2.01516	-0.154519	186.488	80.6847	0	-1
Natural gas	122.61	150.689	175.399	201.254	0.0161142	94.1726	78.4413	58.7392	-0.0234592	104.298	95.9963	61.5573	-0.0219819	57.5925	51.2465	0	-1	93.5582	75.2482	46.2285	-0.0309751	94.0198	76.0877	44.6105	-0.032088	96.7691	82.2962	56.1222	-0.0248939	92.5189	83.0014	58.7391	-0.0234593
Uranium	275.78	205.36	84.422	0	-1	205.36	84.422	0	-1	205.327	84.4222	0	-1	205.287	84.422	0	-1	205.36	84.422	0	-1	205.36	84.422	0	-1	205.36	84.422	0	-1	98.8032	0	0	-1
Woody biomass	42.33	42.4786	42.4786	42.4786	0.000113051	49.3049	54.948	61.9406	0.0123557	42.6762	44.5118	48.2334	0.00422032	49.9365	56.0338	63.3549	0.0130932	49.9365	56.0338	63.3549	0.0130932	49.9365	56.0338	63.3549	0.0130932	49.3049	54.948	61.9406	0.0123557	49.3049	54.948	61.9405	0.0123557
Waste (incl. non renewable waste)	68.3308	68.5474	69.4443	70.5348	0.00102457	71.3724	75.0682	78.629	0.00588691	66.1979	68.9407	70.8306	0.00172237	72.8517	76.7061	78.6289	0.00586388	71.3096	75.0682	78.6289	0.00589295	68.5474	72.5373	78.6289	0.00596133	68.5474	69.4444	78.629	0.00574472	71.6147	75.0682	78.6289	0.00586389
Manure1		2.84953	5.78398	8.29736	-	17.1067	21.5822	27	-	6.56618	21.583	27.0014	-	17.1067	21.5822	27	-	17.1067	21.5822	27	-	13.8492	14.3882	27	-	11.4051	14.0362	27	-	17.1067	21.5822	27	-
Biofuels/e-fuels (liquids or gases)	7.37	4.2732	4.2732	4.2732	-0.0174287	12.0676	18.0493	37.3973	0.0537897	10.9612	52.0344	58.1822	0.0689217	6.76711	6.88931	10.6132	0.0118332	12.0981	21.6207	51.8143	0.0649323	12.0085	19.3743	49.042	0.063045	12.1695	21.0855	38.4998	0.0547778	10.2148	18.4135	37.3973	0.0537897
Hydro (incl. pump)	146	147.556	147.808	151.118	0.00111201	150.245	151.389	151.992	0.00129824	149.26	151.191	151.609	0.00121687	150.461	153.394	157.486	0.00244587	150.353	152.287	152.803	0.00147012	150.224	151.289	151.76	0.00124899	150.246	151.382	151.98	0.00129584	150.346	151.448	152.026	0.00130554
Solar	10.482	19.6488	31.5171	49.2094	0.0511499	36.2265	66.0054	106.062	0.0775144	30.6744	57.2494	82.6796	0.0688925	69.6771	124.639	186.402	0.0972934	50.9961	87.0857	123.793	0.0829011	38.3001	73.0468	106.594	0.0776884	34.2339	63.8947	101.635	0.0760336	45.2604	76.5502	111.122	0.0791357
Wind	0.525	0.260711	0.424673	0.691748	0.00893723	1.77237	7.17024	15.48	0.115339	1.6362	3.75937	6.12223	0.0824586	2.28113	9.22844	15.48	0.115339	0.260709	0.424667	0.691739	0.00893679	0.265011	0.431677	0.703157	0.00946978	1.77238	7.17024	15.48	0.115339	2.28113	9.22844	15.48	0.115339
Deep geothermal		0	8.62079e-05	8.73068e-05	-	0	0.0032407	5.47721	-	0	0	0	-	0	1.4785	120.651	-	0	0	0	-	0	1.07572e-06	1.08455e-06	-	0	0.00552606	0.0666121	-	0	3.20709	3.2071	-
Environmental heat	18.017	40.2372	49.8415	53.3455	0.0356355	58.489	82.0741	98.2467	0.0562396	42.6839	62.8255	69.9823	0.0447439	55.3698	70.8244	85.9602	0.0593165	59.8664	81.3559	95.6252	0.0553185	62.0374	82.1429	95.8105	0.0553844	62.0374	82.1429	95.8105	0.0553844	56.8448	80.4136	98.4555	0.0563119
Electricity	-22.53	6.82176	32.449	32.449	-2.01184	7.62366	22.0718	15.5906	-1.98819	-4.89041	1.45444	0.346393	-1.874	-5.09546	-5.79754	-6.64979	-0.0385986	-5.01305	12.4509	30.5699	-2.00989	7.47655	18.5553	34.1741	-2.01353	7.84244	18.821	14.331	-1.98551	29.3107	25.1995	15.7968	-1.98861
Hydrogen	0	0	0	4.59263e-08	-	0	0.822811	0.82281	-	0	0	0	-	0	0.00348828	0.00348829	-	0	1.94225	1.94225	-	0	0.373677	0.373677	-	0	1.94225	1.94225	-	0	0.499215	0.499214	-
ENERGY CONVERSION SECTOR
Fuel input for electricity and CHPs (PJ/yr.)3	522.029	490.293	399.134	350.134	-0.0128015	496.096	431.062	436.471	-0.00575931	494.738	427.672	367.712	-0.0112421	519.404	472.88	602.556	0.00463666	509.734	456.346	452.224	-0.00462153	499.204	440.74	429.323	-0.00628877	490.838	416.751	407.183	-0.00798455	397.801	359.98	445.259	-0.00512272
Oil products (incl. bioliquids and synthetic liquids)	0.45	1.35983e-05	1.25447e-05	1.03617e-05	-0.291411	4.10921e-05	5.9485e-05	1.73011e-05	-0.279596	0.353015	0.329103	0.353305	-0.00777337	0	0	0	-1	0	0	0	-1	0	0	0	-1	0.000219591	0.00019319	0.000106935	-0.235999	2.64395e-05	5.57091e-05	1.28984e-05	-0.286388
Gas (natural gas and biomethane)4	13.824	41.9401	59.1005	71.8807	0.0546203	17.1882	30.4928	49.2618	0.0418435	29.1629	51.7901	42.0602	0.0365454	16.5792	17.8659	41.7112	0.0362669	17.1526	30.4941	49.2379	0.0418272	19.0462	30.283	48.7526	0.0414944	18.1076	19.9441	26.0674	0.0206714	17.2921	28.0364	49.2956	0.0418666
Uranium	275.78	205.36	84.422	0	-1	205.36	84.422	0	-1	205.327	84.4222	0	-1	205.287	84.422	0	-1	205.36	84.422	0	-1	205.36	84.422	0	-1	205.36	84.422	0	-1	98.8032	0	0	-1
Woody biomass	5.731	7.97439	7.9703	7.97058	0.0106977	16.0492	18.6608	16.5151	0.0347309	15.1534	16.3878	11.9054	0.0238644	15.8488	16.0173	13.7956	0.0287427	15.7801	19.1925	16.1909	0.0340694	15.435	19.8342	17.1597	0.0360098	15.3259	22.959	22.7971	0.0455468	17.3118	20.6247	17.9425	0.0375016
Waste (incl. non renewable waste)	53.2753	54.2217	55.1376	56.2472	0.00175259	54.2217	55.138	58.828	0.00320333	51.843	52.1782	55.9397	0.00157544	55.4588	56.3518	58.8517	0.00321637	54.2217	55.1376	58.8192	0.00319851	54.2217	55.1376	58.8424	0.00321128	54.2218	55.1381	58.8293	0.00320408	54.2217	56.3685	58.8215	0.00319978
Biogas	3.674	2.24797	2.47901	2.65421	-0.0104334	2.31783	5.19413	5.24704	0.0115626	1.80219	2.67419	3.36486	-0.00283134	1.97811	2.3746	16.0992	0.0488149	2.82815	12.2063	12.3114	0.0397788	2.47755	9.51803	9.61517	0.0315208	2.32311	2.29036	2.31618	-0.0147725	2.11626	3.93434	3.97138	0.00251388
Hydro (excluding pump storage)	131.096	132.137	132.235	135.313	0.00102197	134.642	135.313	135.313	0.00102542	133.726	135.317	135.317	0.00102636	134.699	137.073	140.471	0.00223413	134.641	136.242	136.242	0.00124627	134.641	135.313	135.313	0.00102542	134.643	135.313	135.313	0.00102542	134.699	135.313	135.313	0.00103128
Solar	7.84	15.2986	26.0944	42.505	0.0560425	26.9915	55.52	93.0573	0.0830766	21.6271	44.3042	72.003	0.0741517	48.5923	105.507	164.445	0.103153	41.5418	75.7797	112.512	0.0897297	30.2674	64.197	97.7678	0.0848032	26.9916	55.0225	89.6268	0.0817651	33.5402	63.0137	97.6103	0.0847468
Wind	0.525	0.260713	0.424673	0.691748	0.00893723	1.77237	7.17024	15.48	0.115339	1.63445	3.75761	6.12048	0.0824486	2.28113	9.22844	15.48	0.115339	0.260709	0.424668	0.69174	0.00893684	0.265014	0.431679	0.70316	0.00946991	1.77237	7.17024	15.48	0.115339	2.28113	9.22844	15.48	0.115339
Deep geothermal	0	0	8.62079e-05	8.73068e-05	-	0	0.00322824	2.78429	-	0	0	0	-	0	9.03871e-05	105.072	-	0	0	0	-	0	7.17147e-06	7.23032e-06	-	0	0.0055015	0.0661303	-	0	3.20699	3.20691	-
Hydrogen	0	5.93009e-05	0.000152598	0.000155623	-	6.17542	6.14921	12.0418	-	0.114519	0.125619	4.9815	-	6.86139	7.22425	6.55946	-	6.17693	6.15002	10.1502	-	6.20146	6.35631	10.9207	-	0.666937	1.18998	12.3931	-	6.16952	6.90819	12.0306	-
Electricity consumption in storages (TWh/yr.)	4.1401	4.28503	4.34305	4.56542	0.00315947	4.35793	4.5831	6.65871	0.0154166	4.72132	5.05362	4.95364	0.00577356	4.41906	5.11332	5.56548	0.00955912	4.41252	5.04128	7.78738	0.0205584	4.3455	4.89543	6.97892	0.0169563	4.36464	4.62437	6.1519	0.0128268	15.6827	16.6725	25.7934	0.0177667
Pump storage consumption	4.1401	4.2832	4.32562	4.39017	0.00189366	4.33431	4.46562	4.63292	0.00360421	4.31479	4.4094	4.52559	0.00284567	4.37815	4.5334	4.72636	0.00425086	4.36422	4.45703	4.60024	0.00337504	4.32848	4.4376	4.56858	0.0031516	4.33431	4.46369	4.62978	0.00358228	15.647	16.1348	16.7129	0.00361918
Stationary Batteries and CAES	0.00710122	0.00182418	0.0174246	0.175245	0.108953	0.0236236	0.117483	2.02579	0.183293	0.406533	0.644219	0.428053	0.125421	0.0409115	0.579918	0.839121	0.150125	0.0483068	0.584247	3.18714	0.200718	0.0170279	0.457826	2.41034	0.189946	0.0303302	0.160679	1.52211	0.172432	0.0356814	0.537665	9.08057	0.173703
Fuel input in centralised heat plants5 (PJ/yr.)	3.08336	1.07912e-05	3.0371e-06	2.91474e-06	-0.36076	7.87433	6.64108	10.965	0.0417744	5.81745	3.36978	7.14857	0.0274968	9.13467	10.943	23.3146	0.0674365	8.45414	5.12261	12.6601	0.0466163	5.69561	3.60191	11.0222	0.0419492	6.11459	2.44094	4.83933	0.0146468	10.2038	7.92565	10.9411	0.0417012
Oil products	0.16384	0	0	0	-1	7.08812e-06	6.34005e-06	0	-1	0.0672194	0.0232642	0.000301804	-0.183824	0	0	0	-1	0	0	0	-1	0	0	0	-1	2.67453e-05	3.38331e-05	1.16391e-05	-0.265186	3.73815e-06	4.93901e-06	0	-1
Gas (natural gas and biomethane)4	2.91	1.07912e-05	3.0371e-06	2.91474e-06	-0.359566	2.04823e-05	1.02475e-05	0	-1	2.38325	0.0486856	0.000293412	-0.256838	0	0	0	-1	0	0	0	-1	0	0	0	-1	2.36168	9.8404e-05	2.77698e-05	-0.311262	1.01646e-05	1.13624e-05	0	-1
Woody biomass	0	0	0	0	-	3.94905	2.36445	1.41569	-	3.08979	1.85636	1.11816	-	3.72073	2.22774	1.33383	-	3.67794	2.20212	1.31849	-	3.33472	1.99662	1.19545	-	3.22542	1.93118	1.15628	-	5.211	3.12002	1.86807	-
Biogas	0	0	0	0	-	2.46995	1.91964	3.48085	-	0.259281	0.0680866	0.000823958	-	1.86168	3.68458	0	-	1.85571	0	8.42112	-	0.97425	0.218653	8.44007	-	0.0188448	0.000957601	4.54086e-05	-	1.8507	1.66347	5.09874	-
Solar (thermal)	0	0	0	0	-	0.760273	1.66193	2.68051	-	0.000702595	1.28889	1.28913	-	3.55225	3.55225	6.4017	-	2.45624	2.45624	2.45624	-	0	0	0	-	0	9.02574e-06	3.16094	-	3.06043	3.06043	3.06043	-
Deep geothermal	0	0	0	0	-	0	1.24639e-05	2.69292	-	0	0	0	-	0	1.47841	15.579	-	0	0	0	-	0	0	0	-	0	2.45575e-05	0.000481729	-	0	0.000103566	0.000190178	-
Electricity (heat pumps)	0.00952	0	0	0	-1	0.695029	0.695032	0.695031	0.148441	0.0172077	0.0844892	4.73986	0.221811	0	0	0	-1	0.464253	0.464253	0.464253	0.133588	1.38664	1.38664	1.38664	0.174315	0.508623	0.508628	0.521545	0.137852	0.0816116	0.0816133	0.913685	0.158619
Fuel input for hydrogen production (PJ/yr.)	0	0.000101616	0.000287908	0.000289378	-	13.038	21.6627	62.1859	-	0.583526	1.19717	21.6713	-	17.8207	48.7619	125.454	-	13.3854	23.7516	71.73	-	13.1405	19.0167	58.9188	-	1.58136	5.94821	53.4991	-	12.985	21.934	69.2139	-
Gas (natural gas and biomethane)4	0	0.000101616	0.000281744	0.000282027	-	9.04982	10.5491	15.0876	-	0.572968	1.18372	1.23526	-	0	0	0	-	7.93451	7.93451	8.73946	-	9.04982	9.04982	9.96792	-	0.000276107	0.000374369	10.3642	-	9.04982	16.5871	18.2097	-
Woody biomass	0	0	0	6.5679e-08	-	0	0	16.2898	-	0	0	20.4173	-	0.949315	5.92211	15.0657	-	0	0	17.2737	-	0.814785	0.789926	15.9407	-	0	0	20.3644	-	0	0	15.1134	-
Electricity	0	0	6.16402e-06	7.28526e-06	-	3.98818	11.1135	30.8085	-	0.0105579	0.0134485	0.0187034	-	16.8714	42.8398	110.388	-	5.45089	15.8171	45.7169	-	3.27587	9.17696	33.0102	-	1.58108	5.94784	22.7705	-	3.93521	5.34688	35.8908	-
Fuel input for production of domestic biofuels and synfuels7,8,20 (PJ/yr.)	7.61084	11.6827	14.6171	17.1305	0.026516	28.7649	43.7411	59.0408	0.0841198	16.129	35.2284	42.4552	0.0627727	34.5715	53.2398	115.399	0.107469	28.7021	44.2824	70.2925	0.0903265	22.6823	33.0891	69.643	0.0910224	20.2383	23.6024	50.9013	0.0769303	29.0071	40.834	62.9047	0.0860031
Manure	0	2.84953	5.78398	8.29736	-	17.1067	21.5822	27	-	6.56618	21.583	27.0014	-	17.1067	21.5822	27	-	17.1067	21.5822	27	-	13.8492	14.3882	27	-	11.4051	14.0362	27	-	17.1067	21.5822	27	-
Wastes1	7.61084	8.83314	8.83314	8.83314	0.00481597	11.6581	14.4571	16.9273	0.0412983	9.55862	13.4526	15.2847	0.0283202	11.9004	14.457	16.9272	0.0409763	11.5953	14.457	16.9272	0.0413834	8.83314	11.9262	16.9272	0.0423602	8.83314	8.83328	16.9273	0.0393545	11.9004	14.4571	16.9273	0.0409763
Woody biomass	0	0	1.25183e-06	2.00153e-06	-	4.31631e-05	5.78228	10.3469	-	0.00302231	0.147639	0.160758	-	5.54317	7.99083	17.6713	-	0	5.63901	10.8242	-	0	4.96673	11.3343	-	9.29001e-05	0.000302082	0.000292642	-	2.45045e-05	4.79465	10.1714	-
Electricity	0	0	0	0	-	0	1.91258e-05	3.72411e-06	-	0.00119487	0.0310392	0.00574871	-	0.0211646	0.0235335	0.0140905	-	0	0	0	-	0	0	0	-	6.69312e-06	5.00846e-05	1.65696e-05	-	0	1.01452e-07	1.58667e-06	-
Hydrogen	0	0	0	0	-	0	1.9194	4.7666	-	0	0.014117	0.00254435	-	0	9.18615	53.7861	-	0	2.60414	15.541	-	0	1.80796	14.3814	-	0	0.732514	6.97367	-	0	4.76603e-05	8.80606	-
Fuel input in Direct Air Capture (PJ/yr.)	0	0	0	0	-	0	2.18111e-06	0.675971	-	0	0.00718056	0.855111	-	0	2.69341e-09	0.115585	-	0	0	0.661212	-	0	0	5.64142e-07	-	0	5.62922e-06	0.685155	-	0	2.2926e-06	0.704374	-
Electricity	0	0	0	0	-	0	3.52271e-07	0.0844526	-	0	0.00115973	0.106834	-	0	4.35012e-10	0.0144406	-	0	0	0.0826087	-	0	0	7.04813e-08	-	0	9.09174e-07	0.0856	-	0	3.70276e-07	0.0880012	-
Heat	0	0	0	0	-	0	1.82884e-06	0.591518	-	0	0.00602083	0.748278	-	0	2.2584e-09	0.101144	-	0	0	0.578603	-	0	0	4.93661e-07	-	0	4.72005e-06	0.599555	-	0	1.92232e-06	0.616373	-
Domestic electricity production by source (TWh/yr.)3	67.9062	66.9839	62.1977	62.7568	-0.00254065	70.2692	70.1762	77.1754	0.00381651	68.9303	68.7307	69.9869	0.000655484	76.6086	84.8985	102.215	0.012957	73.9189	74.4519	78.6673	0.00443668	70.626	70.9581	74.4627	0.00265848	69.3884	69.3384	76.1694	0.00339173	62.4922	65.4098	78.4491	0.00434921
Oil products	0.0314	3.7773e-06	3.48463e-06	2.87825e-06	-0.259119	1.14145e-05	1.65236e-05	4.80586e-06	-0.246765	0.0980598	0.0914176	0.0981403	0.037445	0	0	0	-1	0	0	0	-1	0	0	0	-1	6.09975e-05	5.3664e-05	2.97041e-05	-0.201182	7.34432e-06	1.54748e-05	3.5829e-06	-0.253867
Gas (natural gas and biomethane)4	0.6636	3.9164	7.06768	9.87156	0.0909929	1.5489	1.8372	2.09857	0.037838	2.99909	6.4103	3.13904	0.0514065	1.54888	2.31717	2.38017	0.0420621	1.54888	1.83516	2.09864	0.0378391	1.54888	1.8511	2.11894	0.0381615	1.54891	2.32936	3.01426	0.0500317	1.54889	1.93375	2.0982	0.0378321
Gas (natural gas and biomethane)4 with CCS	0	0	0	0	-	0	0.492297	1.01145	-	0	0.0271347	3.04848	-	0	0.0122713	0.729832	-	0	0.494282	1.01136	-	0	0.478338	0.991058	-	0	0.000281875	0.0961487	-	0	0.395752	1.01182	-
Nuclear power plants	25.2806	18.826	7.77869	0	-1	18.826	7.77869	0	-1	18.826	7.7787	0	-1	18.826	7.77869	0	-1	18.826	7.77869	0	-1	18.826	7.77869	0	-1	18.826	7.77869	0	-1	9.08392	0	0	-1
Woody biomass	0.312778	0.575586	0.575588	0.575589	0.019869	0.873667	1.22359	0.559915	0.0189611	0.857414	0.858987	0.455945	0.0122316	0.912147	0.761611	0.476864	0.0136974	0.873666	1.05562	0.446255	0.0115304	0.873666	1.18053	0.551952	0.0184904	0.873668	1.26134	0.451789	0.0119326	0.873667	1.28344	0.53447	0.0174336
Woody biomass with CCS	0	0	0	0	-	0	2.45253e-05	0.696778	-	0	0.00258573	0.405439	-	0	0.173547	0.531964	-	0	0.0395488	0.687392	-	0	0.0191946	0.695529	-	0	0.294465	1.28183	-	0	9.26507e-05	0.788274	-
Waste (incl. non renewable waste)	2.355	2.51589	2.5539	2.6001	0.00319896	2.52501	2.07506	1.22233	-0.0209322	2.42884	2.45191	1.1054	-0.0241027	2.57855	2.22464	1.22232	-0.0209323	2.52482	2.10119	1.2225	-0.0209276	2.51567	2.07963	1.22232	-0.0209323	2.51589	1.73986	1.24848	-0.0202633	2.5258	2.13105	1.22232	-0.0209322
Waste with CCS	0	0	0	0	-	0	0.461967	1.4528	-	0	0.0038633	1.39643	-	0	0.389008	1.45358	-	0	0.438394	1.45252	-	0	0.450561	1.45328	-	0	0.746938	1.45283	-	0	0.502461	1.45259	-
Biogas	0.372222	0.123407	0.123407	0.123407	-0.0349862	0.127302	0.289932	0.297629	-0.00718838	0.0946325	0.146882	0.191098	-0.021277	0.108644	0.132335	0.912936	0.029364	0.15533	0.679779	0.695072	0.0203502	0.136074	0.530389	0.544521	0.0123471	0.127591	0.127772	0.131527	-0.0330006	0.116231	0.219782	0.225171	-0.0160832
Hydro (excluding pump storage)	36.567	36.7046	36.732	37.587	0.000887879	37.4005	37.587	37.587	0.000298913	37.1462	37.5881	37.5881	0.000299858	37.4165	38.076	39.0197	0.00150675	37.4004	37.8449	37.8449	0.000519606	37.4004	37.587	37.587	0.000298912	37.4007	37.587	37.587	0.000298913	37.4165	37.587	37.587	0.000303499
Solar	2.17778	4.2496	7.24844	11.8069	0.0560425	7.49765	15.4222	25.8492	0.0830766	6.00753	12.3067	20.0008	0.0741517	13.4979	29.3074	45.6791	0.103153	11.5394	21.0499	31.2533	0.0897297	8.40762	17.8325	27.1577	0.0848032	7.49765	15.284	24.8963	0.0817651	9.31672	17.5038	27.114	0.0847468
Wind	0.145833	0.0724201	0.117965	0.192152	0.00893723	0.492326	1.99173	4.3	0.115339	0.454013	1.04378	1.70013	0.0824486	0.633647	2.56346	4.3	0.115339	0.0724193	0.117963	0.19215	0.00893684	0.0736149	0.119911	0.195322	0.00946991	0.492326	1.99173	4.3	0.115339	0.633647	2.56346	4.3	0.115339
Deep geothermal	0	0	3.59199e-06	3.63778e-06	-	0	0.00013451	0.116012	-	0	0	0	-	0	3.76613e-06	4.378	-	0	0	0	-	0	2.98811e-07	3.01263e-07	-	0	0.000229229	0.00275543	-	0	0.133625	0.133621	-
Hydrogen	0	9.58302e-06	2.54121e-05	2.66108e-05	-	0.977777	1.01632	1.98367	-	0.0184694	0.0202989	0.857816	-	1.08639	1.16235	1.13074	-	0.978015	1.01646	1.76318	-	0.844088	1.05029	1.94502	-	0.105603	0.196666	1.7064	-	0.976843	1.15556	1.98167	-
Electricity production from storages (TWh/yr.)	3.31724	3.42827	3.47637	3.66646	0.00323405	3.4872	3.71111	5.60233	0.0169901	3.96267	4.40098	4.54393	0.0101439	3.53599	4.1959	4.57064	0.0103349	3.52887	4.06987	6.46165	0.0216823	3.47625	3.94438	5.74455	0.0178128	3.4918	3.7143	5.14156	0.0141783	3.4865	3.75843	6.06239	0.0194847
Pump storage production6	3.31208	3.42656	3.4605	3.51214	0.00189366	3.46745	3.57249	3.70634	0.00360421	3.45184	3.52746	3.62047	0.00284569	3.50252	3.62672	3.78109	0.00425086	3.49137	3.56563	3.68019	0.00337504	3.46278	3.55008	3.65487	0.0031516	3.46745	3.57095	3.70383	0.00358228	3.47712	3.58551	3.71397	0.00361918
Stationary Batteries and CAES	0.00516305	0.00170205	0.0158694	0.154328	0.11583	0.0197541	0.138614	1.896	0.193039	0.510831	0.873517	0.923454	0.165672	0.0334716	0.569182	0.789552	0.159796	0.0375014	0.504245	2.78146	0.207879	0.0134638	0.394293	2.08968	0.196788	0.0243541	0.143341	1.43774	0.182438	0.00938565	0.172913	2.34843	0.183766
Electricity capacities by source (GW/yr.)	18.9258	21.5176	23.8222	27.8797	0.0125744	24.5849	32.6403	44.3282	0.027835	23.4261	30.089	37.3364	0.0221595	31.0346	47.6516	65.8092	0.0410201	28.5537	37.4601	47.2464	0.0299511	25.2459	34.1184	43.0087	0.0268336	24.3778	32.4561	43.4232	0.0271514	26.5707	35.2193	45.5164	0.0287124
Oil products	0.075	1.33999e-05	2.01201e-06	1.95212e-06	-0.288605	0.00022365	2.05883e-05	1.71576e-05	-0.236936	0.0993206	0.101547	0.0810241	0.00249532	1.10412e-06	1.052e-07	5.20121e-08	-0.367116	3.75229e-07	3.50762e-08	2.97707e-08	-0.378405	8.21856e-07	8.01986e-08	6.03197e-08	-0.364084	0.000473398	5.79297e-05	5.35245e-05	-0.208411	0.000145417	1.60826e-05	1.2544e-05	-0.244606
Gas (natural gas and biomethane)4	0.280478	1.36758	1.9007	2.39446	0.0716234	0.48741	0.525446	0.555736	0.022303	1.05946	2.13251	1.31102	0.0510019	0.468051	0.67099	0.670971	0.028536	0.505791	0.526189	0.555676	0.0222995	0.481391	0.542872	0.561	0.022614	0.50742	0.824465	1.02332	0.0426359	0.503996	0.550937	0.555638	0.0222972
Gas (natural gas and biomethane)4 with CCS	0	0	0	0	-	0	0.130444	0.267994	-	0	0.0268545	0.461304	-	0	0.00363156	0.204951	-	0	0.130964	0.267967	-	0	0.126739	0.262588	-	0	0.000108156	0.0254682	-	0	0.104862	0.268091	-
Nuclear	2.96	2.595	1.22	0	-1	2.595	1.22	0	-1	2.595	1.22	0	-1	2.595	1.22	0	-1	2.595	1.22	0	-1	2.595	1.22	0	-1	2.595	1.22	0	-1	2.595	1.22	0	-1
Woody biomass	0.0934928	0.151113	0.151152	0.151308	0.0156513	0.218128	0.319806	0.138819	0.0128328	0.233867	0.25373	0.152426	0.0158924	0.218125	0.176897	0.113845	0.00637345	0.218124	0.276754	0.111606	0.00572901	0.223629	0.30831	0.137776	0.0125865	0.221768	0.326675	0.12336	0.00898266	0.218128	0.331737	0.141971	0.0135667
Woody biomass with CCS	0	0	0	0	-	0	1.10294e-05	0.130805	-	0	0.00972714	0.0682901	-	0	0.187034	0.187034	-	0	0.0486336	0.148244	-	0	0.0247548	0.110591	-	0	0.0408979	0.246157	-	0	5.66493e-05	0.145482	-
Waste (incl. non renewable waste)	0.451607	0.475302	0.482566	0.491393	0.00272732	0.475301	0.382191	0.221814	-0.0226737	0.458038	0.458496	0.199677	-0.0259827	0.485382	0.410502	0.221798	-0.0226759	0.475302	0.38714	0.221818	-0.0226731	0.47526	0.384604	0.221802	-0.0226754	0.475303	0.323261	0.221814	-0.0226736	0.475301	0.391521	0.221817	-0.0226733
Waste with CCS	0	0	0	0	-	0	0.0936805	0.283917	-	0	0.0062702	0.274954	-	0	0.0800073	0.284081	-	0	0.0892171	0.283857	-	0	0.0915216	0.284019	-	0	0.146487	0.283925	-	0	0.102786	0.283873	-
Biogas	0.0422213	0.0257867	0.0257867	0.0257867	-0.0157795	0.0266003	0.0605829	0.062191	0.0125715	0.0197301	0.0301795	0.0397561	-0.00193884	0.0227017	0.0276521	0.190763	0.0498515	0.0324571	0.142044	0.145239	0.0406583	0.0284335	0.110828	0.113781	0.0324959	0.0266608	0.0266983	0.0274831	-0.0137546	0.0242871	0.0459247	0.0470507	0.0034997
Hydro (excluding pump storage)	12.4496	12.4496	12.4496	12.4496	0	12.4496	12.4496	12.6745	0.000577638	12.4496	12.4496	12.6561	0.000530853	12.4496	12.5426	12.916	0.00118724	12.4496	12.4546	12.4556	1.55221e-05	12.4496	12.4496	12.4496	0	12.4496	12.4496	12.5176	0.00017584	12.4496	12.4496	12.5456	0.00024782
Solar	2.49805	4.41013	7.52225	12.2529	0.0526371	7.78087	16.0048	26.8257	0.079584	6.23409	12.7713	20.7561	0.0706876	14.0077	30.4145	47.4046	0.0995954	11.9753	21.8451	32.4339	0.0862156	8.72522	18.5061	28.1836	0.0813051	7.78088	15.8614	25.8368	0.0782768	9.66866	18.165	28.1382	0.0812488
Wind	0.07537	0.0430645	0.0701475	0.114263	0.0135128	0.292761	1.18438	2.55699	0.120397	0.26991	0.620623	1.01092	0.0873556	0.376797	1.52435	2.55699	0.120397	0.043064	0.0701467	0.114262	0.0135124	0.043775	0.0713048	0.116148	0.0140479	0.292761	1.18438	2.55699	0.120397	0.376797	1.52435	2.55699	0.120397
Deep geothermal	0	0	5.48992e-07	5.48992e-07	-	0	1.92202e-05	0.0165731	-	0	3.55911e-05	2.00339e-05	-	0	5.38003e-07	0.630983	-	0	2.00812e-08	2.00812e-08	-	0	6.13396e-08	6.13396e-08	-	0	3.29374e-05	0.000393637	-	0	0.0190892	0.0190892	-
Hydrogen	0	2.6348e-06	7.46369e-06	7.80855e-06	-	0.25907	0.269292	0.593187	-	0.00710068	0.00814664	0.324815	-	0.411209	0.393455	0.427126	-	0.259133	0.269319	0.508292	-	0.223648	0.281785	0.567827	-	0.027982	0.0521218	0.559845	-	0.258822	0.313393	0.592607	-
Electricity capacities in storages (GW/yr.)	3.2282	4.14396	4.3124	4.68879	0.0121131	4.25516	4.6191	6.66518	0.0236618	4.76835	5.4344	11.2557	0.0411111	4.26415	4.85631	7.58341	0.0279326	4.26283	4.81788	7.02019	0.0253768	4.25364	4.74098	6.47757	0.0227194	4.25519	4.59534	6.04399	0.0204363	4.25629	4.7273	6.97868	0.0251807
Pump storage	3.1245	4.13135	4.27135	4.47135	0.0116289	4.13135	4.27135	4.47135	0.0116289	4.13135	4.27135	4.47135	0.0116289	4.13135	4.27135	4.47135	0.0116289	4.13135	4.27135	4.47135	0.0116289	4.13135	4.27135	4.47135	0.0116289	4.13135	4.27135	4.47135	0.0116289	4.13135	4.27135	4.47135	0.0116289
Batteries and CAES	0.103703	0.0126099	0.0410506	0.217447	0.0241721	0.123813	0.347756	2.19383	0.103432	0.637003	1.16305	6.7843	0.144358	0.132797	0.584964	3.11206	0.115948	0.131484	0.546529	2.54884	0.108784	0.12229	0.469627	2.00623	0.100255	0.123838	0.323996	1.57264	0.0916463	0.124947	0.455949	2.50734	0.108204
District heating production (PJ/yr.)	23.57	24.3505	25.5844	27.1675	0.00459263	23.749	25.2758	27.184	0.00662797	23.7524	24.7756	28.5793	0.00825471	24.1797	25.4164	38.4108	0.0179167	24.1797	26.0803	28.025	0.00761794	24.1729	25.7437	28.137	0.00774756	24.1729	25.7437	28.137	0.00774756	23.749	25.2758	27.184	0.00662797
Oil products	0.139264	0	0	0	-1	6.05648e-06	5.41728e-06	0	-1	0.0574359	0.0198782	0.000257878	-0.183686	0	0	0	-1	0	0	0	-1	0	0	0	-1	2.28527e-05	2.89088e-05	9.94508e-06	-0.265062	3.19408e-06	4.22016e-06	0	-1
Gas (natural gas and biomethane)4	5.10818	8.40771	9.49843	10.9731	0.0249715	0.385668	0.209458	0.0486439	-0.130315	6.57854	6.83858	0.430368	-0.0669517	0.359121	0.448107	3.08016	-0.00579447	0.888239	2.45715	2.35249	-0.0144004	0.841371	1.97412	1.86224	-0.0218024	0.841348	1.97409	1.86223	-0.0218026	0.38567	0.209459	0.0486439	-0.130315
Nuclear heat	1.42	1.04193	0	0	-1	1.04193	0	0	-1	1.00858	0	0	-1	0.968997	0	0	-1	1.04193	0	0	-1	1.04193	0	0	-1	1.04193	0	0	-1	1.04193	0	0	-1
Woody biomass	2.556	2.52843	2.52825	2.52825	-0.00035209	5.29259	6.67845	4.13801	0.0156624	4.69227	3.83594	3.07789	0.00601162	5.66712	4.56524	4.70661	0.0198895	5.1028	7.52563	4.11036	0.0154428	5.50349	7.1164	4.06465	0.0150765	5.50349	7.1164	4.06465	0.0150765	5.29259	6.67845	4.13801	0.0156624
Waste	14.318	11.879	12.5414	13.1578	0	11.8788	12.2001	10.9862	0	11.13	11.3391	10.0322	0	12.2112	12.4496	10.9737	0	11.8788	12.2259	10.9737	0	11.88	12.2103	10.9737	0	11.88	12.2103	10.9737	0	11.8788	12.2001	10.9862	0
Biogas	0	0.493416	1.01629	0.50831	-	2.30459	2.43765	3.63136	-	0.23505	1.20049	0.000876473	-	1.42102	2.81244	0.00638602	-	1.41896	0.0225717	6.42784	-	0.746118	0.190202	6.44231	-	0.746118	0.190202	6.44231	-	2.30459	2.43765	3.63136	-
Solar (thermal)	0	0	0	0	-	0.760273	1.66193	2.68051	-	0.000702595	1.28889	1.28913	-	3.55225	3.55225	6.4017	-	2.45624	2.45624	2.45624	-	0	0	0	-	0	0	0	-	0.760273	1.66193	2.68051	-
Deep geothermal	0	0	0	0	-	0	1.05944e-05	2.28898	-	0	0	0	-	0	1.25665	13.2422	-	0	0	0	-	0	0	0	-	0	0	0	-	0	1.05944e-05	2.28898	-
Hydrogen	0	1.55952e-09	3.82862e-06	5.6787e-06	-	1.03436e-06	0.00304204	1.32517	-	0	0.00772577	0.00300018	-	0	0.332091	1.02239e-08	-	0	2.11894e-07	0.311627	-	0	0.0927407	0.634169	-	0	0.0927407	0.634169	-	1.03436e-06	0.00304204	1.32517	-
Electricity (heat pumps)	0.02856	1.03318e-06	1.03244e-06	1.04422e-06	-0.280763	2.08509	2.0851	2.08509	0.148441	0.0499024	0.245019	13.7456	0.220476	0	0	0	-1	1.39276	1.39276	1.39276	0.133588	4.15993	4.15993	4.15993	0.174315	4.15993	4.15993	4.15993	0.174315	2.08509	2.0851	2.08509	0.148441
Domestic hydrogen production by source (PJ/yr.)	0	7.72282e-05	0.000220237	0.000221442	-	9.55991	15.6722	41.112	-	0.442556	0.91109	12.1004	-	11.9251	34.5294	102.679	-	9.69595	16.9243	47.7612	-	9.5779	13.6803	38.9174	-	1.06349	4.09742	34.405	-	9.52429	16.2474	46.1802	-
Gas (natural gas and biomethane)4	0	7.72282e-05	0.000214125	0.000214341	-	6.87786	8.01729	6.5338e-06	-	0.435456	0.884948	0.000783318	-	0	0	0	-	6.03023	6.03023	0	-	6.87786	6.87786	0	-	0.000209841	0.000134993	0	-	6.87786	12.1556	4.18749e-06	-
Gas (natural gas and biomethane)4 with CCS	0	0	0	0	0	0	3.70094e-05	10.4104	0	0	0.0133284	0.851619	0	0	0	0	0	0	0	6.03023	0	0	0	6.87786	0	0	0.000135755	7.15128	0	0	0.409059	12.5647	0
Woody biomass	0	0	0	4.00642e-08	-	0	0	1.92357e-07	-	0	0	0.000411458	-	0.579082	3.61249	0	-	0	0	0	-	0.497019	0.481855	0	-	0	0	4.88652e-06	-	0	0	0	-
Woody biomass with CCS	0	0	0	0	0	0	0	8.95939	0	0	0	11.2292	0	0	0	8.28616	0	0	0	9.50055	0	0	0	8.76738	0	0	0	11.2004	0	0	0	8.31237	0
Electricity	0	0	6.11192e-06	7.06148e-06	-	2.68205	7.65486	21.7421	-	0.00710018	0.012814	0.0183951	-	11.346	30.9169	94.3933	-	3.66573	10.894	32.2304	-	2.20302	6.32063	23.2722	-	1.06328	4.09715	16.0533	-	2.64643	3.68268	25.3031	-
Domestic production of biofuels and synfuels (PJ/yr.)21	5.99	6.13359	7.15963	8.03843	0.00953362	12.7616	21.581	30.9098	0.054361	7.85671	15.4723	18.7147	0.0374326	16.6703	27.7622	72.6393	0.0838258	12.7251	21.8508	38.9766	0.0622774	9.97963	16.8688	38.9607	0.0622635	9.1251	10.558	24.0616	0.0458769	12.9025	19.5059	33.851	0.057457
Biogas (from wet biomass)	5.563	6.13359	7.15963	8.03843	0.0119448	12.7616	15.9543	20.2437	0.0425482	7.85505	15.3965	18.6427	0.0397812	12.9025	15.9543	20.2437	0.0425482	12.7251	15.9543	20.2371	0.0425373	9.97963	11.967	20.2437	0.0425482	9.12504	10.0451	19.2853	0.0409184	12.9025	15.9543	20.2437	0.0425482
Biomethane (from wood gasification)	0	0	3.04278e-07	1.48262e-06	-	2.58404e-05	4.2831	7.2601	-	0.000762416	0.0212552	0.0288	-	3.46328	5.53428	12.1646	-	0	4.17704	7.64015	-	0	3.67906	7.97693	-	5.06321e-05	7.46836e-05	8.27345e-05	-	1.44523e-05	3.55156	7.08041	-
Bioliquids	0.427	0	0	0	-1	1.30505e-06	3.20603e-05	2.80774e-05	-0.267016	0.000891709	0.0452615	0.0414198	-0.0724966	0.304527	0.182331	0.109169	-0.0430427	0	0	0	-1	0	0	0	-1	9.70221e-06	7.47248e-05	6.12066e-05	-0.248356	0	1.02356e-05	1.25078e-05	-0.285888
e-gas7	0	0	0	0	-	0	2.13165e-05	1.28323	-	0	0.00211431	0.000683239	-	0	0.655571	34.534	-	0	0	7.42242	-	0	0	9.10633	-	0	4.74841e-05	1.13012	-	0	5.81229e-06	4.43698	-
e-liquids8	0	0	0	0	-	0	1.34355	2.12272	-	0	0.00715483	0.00106411	-	0	5.43577	5.5878	-	0	1.71943	3.6769	-	0	1.22276	1.63377	-	0	0.512672	3.646	-	0	2.29212e-05	2.08989	-
Biomethane from biogas upgrade (PJ/yr.)	1.3	2.45098	2.81553	3.17308	0.0292034	5.87119	10.3542	14.072	0.0798616	3.53481	6.52443	9.527	0.0663595	8.37335	10.7238	16.5813	0.0855927	6.06615	10.2999	14.263	0.0803315	5.10595	8.0051	14.4387	0.0807582	2.45098	2.81554	5.47227	0.0474571	6.51412	9.97993	13.98	0.0796333
END-USES
Total final energy consumption (PJ/yr.)9	751.274	705.678	665.421	636.035	-0.00535712	652.06	577.456	508.425	-0.0125163	614.659	542.933	477.391	-0.0145205	586.355	530.35	479.86	-0.0143565	654.005	583.296	514.936	-0.0121108	654.519	574.197	504.901	-0.0127378	650.856	575.122	513.332	-0.0122102	643.366	566.566	507.64	-0.0125655
Electricity	205.91	225.517	234.514	238.413	0.00473908	233.502	242.713	243.973	0.00548662	221.668	230.021	232.368	0.00390703	232.985	239.342	235.274	0.00430964	233.978	245.161	248.257	0.00605128	234.596	243.715	248.509	0.00608427	232.961	241.695	247.08	0.00589707	229.058	236.967	243.259	0.00539156
Oil products	328.56	238.635	170.388	120.78	-0.0317666	181.991	84.1382	2.09152	-0.150514	174.79	50.2276	-0.000419677	-1.64548	141.299	61.9136	5.50568	-0.123572	182.448	86.9202	3.62287	-0.135325	182.111	85.7816	1.60976	-0.157658	179.952	80.2897	5.57769	-0.123205	183.243	79.3851	2.05918	-0.150941
Bioliquids/e-liquids12	7.801	5.37131	5.72653	6.07894	-0.0080136	11.7842	16.6638	36.811	0.0513235	10.7988	52.2544	58.5173	0.0671614	8.69919	7.5229	10.5327	0.00973187	11.8143	12.4996	36.807	0.0513198	11.7117	12.3484	38.4181	0.0527737	12.4594	20.359	39.3521	0.0535897	10.1084	18.65	36.8113	0.0513238
Gas (natural gas and biomethane)4,11	114.6	112.613	119.623	131.602	0.00447249	76.1253	54.0092	22.547	-0.0510951	77.2069	51.0466	26.5944	-0.0460279	50.754	45.7346	19.5741	-0.0554133	76.8438	53.4128	22.7364	-0.0508389	73.7727	51.1908	22.3181	-0.0514073	80.2355	64.548	27.0184	-0.0455411	75.0863	53.2903	22.4686	-0.0512017
Biogas	1.889	2.14599	2.54154	2.85339	0.013394	2.93236	5.40313	5.40312	0.0344821	3.08805	6.52245	6.14595	0.0387897	4.09809	4.58889	4.41667	0.0277768	2.97879	10.7118	10.7118	0.0575736	2.38511	8.10013	8.10013	0.0480825	5.49118	7.17874	11.8773	0.0611033	2.95755	4.48384	4.48384	0.0282774
Coal	3.81	3.40719	2.89066	2.355	-0.0153991	1.90702	1.02407	0.201775	-0.0904285	1.94306	0.9795	0.189585	-0.092255	1.90701	0.978799	0.190794	-0.0920689	1.90701	1.02477	0.201797	-0.0904253	1.907	1.02461	0.201467	-0.0904733	1.90702	0.984149	0.189606	-0.0922519	1.90701	1.02421	0.201802	-0.0904245
Wastes	7.44468	5.49254	5.4735	5.45451	-0.00998391	5.49254	5.47347	2.87397	-0.0302368	4.81159	3.76629	0.00101638	-0.249537	5.49254	5.89724	2.85	-0.0304988	5.49254	5.4735	2.88247	-0.0301444	5.49254	5.4735	2.85925	-0.0303975	5.49254	5.4735	2.87278	-0.0302498	5.49254	4.24273	2.88029	-0.0301682
Heat (DH, or CHP)	21.56	34.5718	35.5462	35.3182	0.0160487	36.069	39.376	44.1509	0.0233911	35.1947	39.7057	39.4379	0.0196713	36.45	34.7892	41.925	0.0216847	36.3206	39.0773	44.9207	0.0239619	38.0371	40.2185	46.738	0.0252727	33.6514	33.016	34.7826	0.0155479	36.0774	39.6125	44.1648	0.0234015
Woody biomass	39.04	33.0806	33.2221	32.9186	-0.00548643	31.9673	29.4902	17.186	-0.0261203	26.1546	26.408	13.2399	-0.0342809	26.902	25.3854	16.3913	-0.0276064	33.0059	30.2468	17.5396	-0.0254802	32.5502	29.4708	17.4753	-0.0255956	32.7189	30.7545	16.9053	-0.0266375	30.6332	28.2996	17.0824	-0.0263103
Solar	2.642	4.35026	5.42275	6.70444	0.0304955	8.47467	8.82346	10.3241	0.0449467	9.04657	11.6564	9.38749	0.041746	17.5325	15.5796	15.5551	0.0588558	6.99808	8.84978	8.82533	0.0396729	8.03264	8.84978	8.82631	0.0396766	7.24237	8.87221	8.8477	0.0397578	8.65978	10.4761	10.4517	0.0453608
Hydrogen	0	7.91088e-06	5.38825e-05	4.91298e-05	-	3.3248	8.26683	24.6157	-	0.279955	0.773538	7.07249	-	4.86687	17.7942	41.6846	-	3.40682	9.86481	23.5102	-	3.2925	5.59571	13.1839	-	0.390812	4.08411	16.6104	-	3.2986	9.721	25.3212	-
Environmental heat	18.017	40.4922	50.0734	53.5559	0.0357671	58.489	82.0741	98.2467	0.0562396	49.6765	69.5708	84.4378	0.0510914	55.3698	70.8244	85.9602	0.0516974	58.8104	80.053	94.9211	0.0550669	60.6294	82.428	96.6615	0.0556855	58.3535	77.867	102.219	0.0575909	56.8448	80.4136	98.4555	0.0563119
Final energy consumption in Industry (PJ/yr.)9	145.237	144.495	144.328	143.935	-0.000290317	129.726	127.317	123.692	-0.00516628	126.886	119.79	115.37	-0.00739896	130.159	121.983	117.95	-0.00669044	129.844	129.124	127.681	-0.00414726	129.631	129.089	128.393	-0.00396849	130.282	122.716	120.729	-0.00594407	128.571	125.141	123.298	-0.00526865
Electricity	62.17	64.9715	65.4119	66.5367	0.0021921	63.1717	62.5177	63.245	0.000553171	58.8244	58.9134	59.6198	-0.00135022	62.8009	61.3938	60.5491	-0.000851854	63.1718	63.964	66.931	0.00238316	63.199	64.2388	67.3259	0.00257337	62.5546	60.2877	62.7325	0.000290604	62.0057	61.0336	62.7818	0.000315941
Oil products	12.77	6.62304	4.1817	1.7584	-0.0619555	4.67371	2.15375	0	-1	5.98149	2.64993	0.000658544	-0.272739	4.67372	2.26233	0	-1	4.67372	2.42345	0	-1	4.67369	2.42291	0	-1	5.84213	3.44947	0.000118099	-0.311958	4.67371	2.15405	0	-1
Bioliquids/e-liquids12	0	0	0	0	-	1.16843	1.43572	1.50658	-	0.0306723	0.953865	6.81478	-	1.16843	1.16843	1.42459	-	1.16843	1.16843	1.50674	-	1.16842	1.16842	1.50428	-	5.50664e-05	0.000117123	1.41563	-	1.16843	1.43589	1.50678	-
Gas (natural gas and biomethane)4	35.479	39.0418	41.7413	43.8835	0.00688153	19.8908	17.6445	15.7037	-0.0259492	27.4344	20.4679	18.1118	-0.021456	19.7102	17.445	14.5076	-0.0284353	19.8902	17.6789	15.7049	-0.0259468	19.894	17.6252	15.5353	-0.0262878	23.3164	19.8725	15.809	-0.0257392	19.8937	17.7167	15.7091	-0.0259384
Biogas	0.4281	0.445923	0.560833	0.659876	0.0140557	1.51496	1.51496	1.51496	0.0416097	1.7363	4.53224	4.54224	0.0791651	2.80955	2.80955	2.80955	0.0625706	1.56138	1.56138	1.56138	0.0426244	0.967707	0.967707	0.967707	0.0266579	4.07378	5.46364	10.1622	0.107565	1.54015	1.54015	1.54015	0.0421639
Coal	3.71	3.40719	2.89066	2.355	-0.014554	1.90701	1.02407	0.201775	-0.0896477	1.90929	0.9795	0.189585	-0.0914758	1.90701	0.978799	0.190794	-0.0912895	1.90701	1.02477	0.201797	-0.0896446	1.907	1.02461	0.201467	-0.0896927	1.90701	0.984149	0.189606	-0.0914727	1.90701	1.02421	0.201802	-0.0896438
Wastes	7.44468	5.49254	5.4735	5.45451	-0.00998391	5.49254	5.47347	2.87397	-0.0302368	4.81159	3.76629	0.00101638	-0.249537	5.49254	5.89724	2.85	-0.0304988	5.49254	5.4735	2.88247	-0.0301444	5.49254	5.4735	2.85925	-0.0303975	5.49254	5.4735	2.87278	-0.0302498	5.49254	4.24273	2.88029	-0.0301682
Heat (DH, or CHP)10	12.9439	15.2743	14.8705	14.219	0.00303546	16.3584	20.1622	25.0647	0.0215462	14.8382	16.2528	16.3847	0.0076331	16.5713	15.4796	21.7059	0.0168161	16.3591	20.3666	25.1797	0.021697	16.7737	20.7131	25.9546	0.0226965	14.8113	14.9026	15.3001	0.00540936	16.3566	20.6749	25.0993	0.0215916
Woody biomass	8.909	7.88096	7.84046	7.71133	-0.00464632	7.23804	7.12722	5.28725	-0.0166902	6.62784	6.56221	4.95765	-0.0187298	7.30916	6.89632	6.24867	-0.0113765	7.30915	7.22019	5.41778	-0.0159163	7.23816	7.15239	5.60187	-0.0148551	7.17547	6.82407	4.96804	-0.0186636	7.2252	7.1257	5.28762	-0.016688
Solar	0.0784271	0.0544528	0.0539107	0.053374	-0.0123377	2.48086	2.45616	2.43171	0.117149	2.45871	2.47869	2.45402	0.117478	2.48086	2.45616	2.43171	0.117149	2.48086	2.45616	2.43171	0.117149	2.48086	2.45616	2.43171	0.117149	2.48086	2.47852	2.45384	0.117476	2.48086	2.45616	2.43171	0.117149
Hydrogen	0	3.15267e-06	7.21567e-06	7.62513e-06	-	3.20771	3.14091	3.15564	-	0.0621617	0.0146712	0.0305689	-	3.38918	3.31875	3.32689	-	3.20833	3.12051	3.15647	-	3.22082	3.18684	3.31041	-	0.339311	0.640557	2.43924	-	3.2048	3.07146	3.15278	-
Environmental heat	1.30347	1.30347	1.30347	1.30347	0	2.62192	2.66588	2.70667	0.0238506	2.17052	2.21851	2.263	0.0179547	1.84591	1.87683	1.90554	0.0123249	2.62194	2.66585	2.70664	0.0238502	2.61537	2.65952	2.70053	0.0237756	2.28839	2.33893	2.38588	0.0196926	2.62192	2.66589	2.70668	0.0238506
Final energy consumption in Services and Agriculture (PJ/yr.)9	141.965	142.6	137.533	130.796	-0.00263962	125.604	115.904	106.401	-0.00925892	123.169	114.836	103.287	-0.0102077	119.836	114.838	104.209	-0.00992397	125.646	117.991	108.468	-0.00864375	125.561	116.165	108.131	-0.00874326	125.918	116.155	107.552	-0.00891499	125.479	115.826	106.34	-0.00927713
Electricity	64.06	67.106	67.4695	67.549	0.00171223	71.1285	68.9775	65.5419	0.000737995	69.7995	68.4354	64.9711	0.000455647	70.1744	69.7496	65.8645	0.00089651	70.9422	68.0857	65.2466	0.00059224	71.0754	68.1801	65.5922	0.000762768	70.4231	67.9391	66.601	0.00125562	70.5329	68.9152	65.7523	0.000841481
Oil products	32.8	28.7321	18.8682	8.35203	-0.0431672	7.2227	1.73842	0	-1	10.2065	2.23321	0.000231205	-0.317959	7.93915	2.87251	0	-1	7.34392	2.9615	0	-1	6.98652	2.89733	0	-1	10.3634	4.70167	7.97148e-05	-0.340989	7.40266	1.74081	0	-1
Bioliquids/e-liquids12	0	0	0	0	-	1.80562	1.1589	1.05401	-	0.0884703	0.844181	1.01681	-	0	0	1.01676	-	1.83598	0.0190094	1.08507	-	1.74663	0	1.08507	-	5.57638e-05	0.000116263	1.08499	-	1.85065	1.16049	1.05401	-
Gas (natural gas and biomethane)4	25.317	24.1283	28.2936	35.4236	0.0108945	11.1131	6.59324	1.66981	-0.0839663	12.4506	6.7862	3.6127	-0.0608754	9.26969	7.08119	1.61079	-0.085029	11.2752	5.90119	1.71902	-0.0831077	10.7457	5.22542	1.69826	-0.0834669	12.8018	11.614	1.71908	-0.0831066	11.4318	7.14721	1.66981	-0.0839663
Biogas	1.4609	1.70007	1.98071	2.19351	0.0131976	1.41741	3.88817	3.88816	0.0320808	1.35174	1.99021	1.60371	0.00301319	1.28854	1.77934	1.60712	0.00308186	1.4174	9.15037	9.15037	0.0609718	1.4174	7.13242	7.13242	0.052479	1.41741	1.7151	1.7151	0.0051883	1.41741	2.94369	2.94369	0.0228577
Coal	0	0	0	0	-	0	0	0	-	0	0	0	-	0	0	0	-	0	0	0	-	0	0	0	-	0	0	0	-	0	0	0	-
Heat (DH, or CHP)10	6.32966	10.0823	10.0396	9.4536	0.0130244	9.30854	8.21024	7.22463	0.00427525	9.44564	9.92588	8.2219	0.00847297	9.77856	8.34481	7.87137	0.00705659	9.67847	7.43839	7.7056	0.0063654	10.0967	7.69183	7.84902	0.00696421	9.23633	7.778	7.62509	0.00602445	9.40989	7.97136	7.22472	0.00427568
Woody biomass	9.37	7.46185	7.30504	4.16553	-0.0258116	7.53727	6.96516	2.53869	-0.0412498	6.85775	6.75555	2.40887	-0.0428717	6.852	6.84539	2.44897	-0.042362	7.53727	7.16514	2.6135	-0.0403511	7.53727	6.96515	2.6135	-0.0403511	7.53727	6.96516	2.61349	-0.0403512	7.40389	6.96516	2.53869	-0.0412498
Solar	0.313656	1.18036	1.18036	1.18036	0.0436779	0.896497	0.896498	0.896498	0.0344577	0.861854	0.861868	0.861878	0.0331444	0.864815	0.864815	0.864815	0.0332578	0.922918	0.922918	0.922918	0.0354274	0.922918	0.922918	0.922918	0.0354274	0.922914	0.922914	0.922914	0.0354272	0.896498	0.896498	0.896498	0.0344577
Hydrogen	0	4.7582e-06	3.4841e-05	2.80241e-05	-	0.0427368	0.040139	1.72875	-	0.0689556	0.00879669	0.00884257	-	0.0558082	0.0268804	0.0475374	-	0.0679748	0.0356214	2.15966	-	0.0453957	0.0634766	2.26643	-	0.00375115	0.0207254	0.0111438	-	0.00205137	0.510096	1.72872	-
Environmental heat	2.31344	2.20935	2.39572	2.47861	0.00222707	15.1315	17.4362	21.8585	0.0751357	12.038	16.9951	20.5812	0.0730495	13.6131	17.2738	22.8771	0.0767165	14.6246	16.3108	17.8654	0.0681623	14.9871	17.0859	18.9714	0.0702339	13.2117	14.4983	25.2591	0.0801622	15.1315	17.576	22.5319	0.0761885
Final energy consumption in Residential (PJ/yr.)9	226.87	229.799	226.123	218.925	-0.00114927	226.651	203.907	174.16	-0.00849278	194.655	177.368	151.775	-0.0128834	182.927	174.466	158.927	-0.0114159	228.496	205.906	174.361	-0.00845594	227.468	204.772	174.993	-0.00834021	227.308	208.004	177.764	-0.00783749	219.037	196.056	173.523	-0.00860996
Electricity	68.73	73.4129	73.1582	71.288	0.00117949	72.9055	69.9685	65.539	-0.00153237	66.3507	61.6877	59.5595	-0.00460902	65.1155	61.012	61.3598	-0.00365238	73.5574	72.446	65.7696	-0.00141924	74.4106	71.4005	66.1197	-0.00124823	73.3322	69.5746	67.4448	-0.000608732	70.4199	65.9333	65.4735	-0.00156459
Oil products	66.74	40.875	26.6408	14.6653	-0.0477058	36.9867	7.49753	0	-1	27.6498	5.80016	0.000200602	-0.336457	19.3393	7.99398	0	-1	37.4445	7.15562	0	-1	35.0532	6.94288	0	-1	36.8047	14.0927	7.93661e-05	-0.35601	35.8913	6.92391	0	-1
Bioliquids/e-liquids12	0	0	0	0	-	1.57182e-05	4.99834	1.54469	-	0.0387744	2.79899	0.527749	-	0	0	0.613529	-	0	4.77041	1.91057	-	0	4.62858	1.03999	-	5.66266e-05	0.000119097	1.09447	-	7.8756e-06	4.6159	1.5193	-
Gas (natural gas and biomethane)4	47.73	48.463	47.049	45.0398	-0.00186967	43.3321	27.4327	5.14667	-0.0693253	35.7497	21.7896	3.31624	-0.0824274	21.4047	18.9	3.4557	-0.0812072	43.8869	27.6864	5.28554	-0.0685257	41.4068	26.1623	5.08453	-0.0696899	42.8575	30.4826	7.95084	-0.056176	42.0367	26.0762	5.06288	-0.069818
Coal	0.1	2.96219e-08	0	0	-1	9.98709e-06	0	0	-1	0.0337665	0	0	-1	0	0	0	-1	0	0	0	-1	0	0	0	-1	1.29344e-05	0	0	-1	6.10117e-06	0	0	-1
Heat (DH, or CHP)10	8.58	9.21508	10.6361	11.6456	0.0099034	10.4021	11.0036	11.8615	0.010502	10.9109	13.527	14.8313	0.0178118	10.1001	10.9648	12.3477	0.0118122	10.2831	11.2723	12.0354	0.0109766	11.1667	11.8136	12.9344	0.0133285	9.60381	10.3355	11.8574	0.0104907	10.3109	10.9662	11.8408	0.0104451
Woody biomass	18.34	17.7378	18.0766	21.0418	0.00444292	17.192	15.3978	9.36003	-0.0214642	12.669	13.0903	5.8734	-0.0360643	12.7408	11.6437	7.69369	-0.0276331	18.1595	15.8615	9.50834	-0.0209679	17.7748	15.3532	9.25998	-0.0218034	18.0062	16.9653	9.32379	-0.0215867	16.0041	14.2088	9.25605	-0.0218168
Solar	2.24992	3.11545	4.18848	5.4707	0.0290764	5.09731	5.4708	6.99587	0.0372723	5.726	8.31582	6.0716	0.0325418	14.1869	12.2586	12.2586	0.0562113	3.5943	5.4707	5.4707	0.0290764	4.62886	5.4707	5.47168	0.0290824	3.83859	5.47078	5.47094	0.0290779	5.28242	7.12346	7.12346	0.0378772
Hydrogen	0	0	1.18906e-06	8.78188e-07	-	1.26381e-05	0.165577	0.0310672	-	0.0578691	0.00152664	0.00127621	-	0.128975	0.0192266	0.0208594	-	0.00595794	0.167121	0.0319047	-	0.000174817	0.31776	0.0931991	-	0.0120232	0.0530864	0.0479776	-	0.000128075	0.036671	0.0305608	-
Environmental heat	14.4001	36.9794	46.3742	49.7738	0.0408193	40.7356	61.972	73.6815	0.0540732	35.468	50.3572	61.5936	0.0479977	39.9108	51.6738	61.1775	0.0477686	41.5639	61.0763	74.349	0.0543799	43.0269	62.6826	74.9897	0.0546717	42.8534	61.0298	74.5739	0.0544826	39.0914	60.1717	73.2169	0.0538581
Final energy consumption in Transport sector (PJ/yr.)	235.581	188.784	157.436	142.378	-0.016113	170.078	130.328	104.172	-0.0259796	169.95	130.938	106.959	-0.0251496	153.433	119.063	98.7734	-0.0276501	170.019	130.275	104.426	-0.025903	171.858	124.171	93.384	-0.0294085	167.348	128.247	107.287	-0.0250533	170.28	129.542	104.478	-0.0258873
Gasoline	97.21	90.4584	65.6626	51.7126	-0.0201545	61.5837	27.1512	1.86614	-0.119721	63.6778	26.5204	0.00179644	-0.296421	42.9066	16.6579	2.32503	-0.113455	61.5153	27.2187	1.46008	-0.126661	66.0709	29.5661	0.872932	-0.141033	60.4572	23.7106	4.58583	-0.0938161	64.0023	23.4427	1.86521	-0.119735
Diesel	116.06	69.3964	52.9136	42.6013	-0.0318128	68.9739	45.1285	0.225387	-0.182432	64.8043	12.5972	0.000480417	-0.329571	63.8893	30.0063	3.18065	-0.109554	68.9204	45.0404	2.16279	-0.120564	66.7766	41.8318	0.736829	-0.150587	65.6247	33.9053	0.991535	-0.142413	68.7227	44.2702	0.193967	-0.186382
Kerosene	2.98035	2.55049	2.12063	1.69078	-0.0181194	2.55044	0.468804	-1.45907e-06	-1.62581	2.47012	0.426645	-0.00378689	-1.80646	2.55049	2.12063	-3.18372e-09	-1.51357	2.55049	2.12063	-9.7739e-10	-1.49438	2.55049	2.12063	-9.19072e-09	-1.53144	0.85977	0.429907	4.81193e-05	-0.299479	2.55048	0.853466	-6.42518e-07	-1.60947
Bioliquids/e-liquids12	7.801	5.37131	5.72653	6.07894	-0.0080136	8.81009	9.07083	32.7057	0.047321	10.6409	47.6574	50.1579	0.0618682	7.53076	6.35447	7.47779	-0.00136407	8.80994	6.54175	32.3046	0.0469041	8.7966	6.55143	34.7888	0.0494091	12.4593	20.3586	35.757	0.0503387	7.08934	11.4377	32.7312	0.0473473
Gas (natural gas and biomethane)4,11	0.58	0.980324	2.53875	7.25554	0.0849129	1.78929	2.3388	0.0267842	-0.0944389	1.5721	2.00284	1.55366	0.0322957	0.369434	2.30829	0	-1	1.79156	2.14628	0.0269968	-0.0942079	1.7262	2.17786	2.07953e-05	-0.281217	1.25972	2.57895	1.5395	0.0319908	1.72413	2.35016	0.0268096	-0.0944112
Electricity	10.95	20.0269	28.474	33.039	0.0362663	26.2967	41.2496	49.6476	0.04997	26.6934	40.9848	48.2174	0.0489805	34.8939	47.1862	47.5007	0.0484738	26.3064	40.6655	50.3095	0.0504187	25.9115	39.8955	49.4715	0.0498497	26.6514	43.8936	50.3015	0.0504133	26.0992	41.0851	49.2519	0.049699
Hydrogen	0	0	1.06368e-05	1.26024e-05	-	0.074344	4.92021	19.7003	-	0.0909688	0.748543	7.0318	-	1.2929	14.4293	38.2893	-	0.124551	6.54155	18.1622	-	0.0261142	2.02764	7.51391	-	0.0357272	3.36974	14.112	-	0.0916129	6.10278	20.4091	-
Private cars (million vehicles)	4.6092	5.21082	5.5467	5.75552	0.00719041	5.21149	5.54722	5.75629	0.00779126	5.21157	5.5474	5.75646	0.00779223	5.21152	5.54719	5.7564	0.00779191	5.21134	5.54718	5.75614	0.00779041	5.21159	5.54747	5.7567	0.00779355	5.21153	5.54729	5.75638	0.00779176	5.21154	5.54729	5.75631	0.00779137
Internal combustion engine	4.48209	3.62351	3.1064	3.1064	-0.011757	2.05092	0.0906264	0	-1	2.17054	0.517133	0.000147902	-0.283138	1.69201	0.0339835	0	-1	2.0447	0.0896445	0	-1	2.28751	0.127964	0	-1	2.04478	0.120753	0.0143448	-0.169149	2.121	0.101686	0	-1
Conventional hybrids	0.083913	0.285847	0.493614	0.493614	0.0588257	1.75781	0.25885	0	-1	1.71518	0.737714	0.723271	0.339525	1.95495	0.286047	0	-1	1.75804	0.258897	0	-1	1.5001	0.217441	0	-1	1.86106	0.277842	3.75486e-05	-0.0256066	1.69225	0.248736	0	-1
Plug-in and battery electric	0.043202	1.30146	1.94668	2.15551	0.134425	1.39562	5.04231	4.76701	0.163844	1.32586	4.26287	4.64038	0.162834	1.53491	4.67515	3.52346	0.152551	1.39534	4.93552	4.91951	0.165027	1.42192	5.13629	5.33815	0.168101	1.30146	5.04456	5.07919	0.166228	1.38731	4.97386	4.735	0.163591
Fuel cell	0	5.90582e-08	5.03946e-07	1.00016e-06	-	0.00714079	0.155434	0.989276	-	0	0.0296815	0.392663	-	0.0296555	0.552012	2.23294	-	0.013254	0.263113	0.836633	-	0.00205029	0.0657699	0.418545	-	0.0042287	0.10414	0.662806	-	0.0109767	0.223001	1.02131	-
Goods vehicles - light and heavy duty (thousands vehicles)	440.795	488.252	539.926	583.17	0.00906985	488.292	539.973	583.22	0.00907266	488.301	540.545	583.337	0.00907919	488.294	539.978	583.232	0.00907334	488.29	539.971	583.22	0.00907264	488.301	539.985	583.236	0.00907356	488.294	539.975	583.226	0.00907299	488.292	539.974	583.22	0.00907269
Internal combustion engine	439.075	206.138	66.7908	72.741	-0.0563429	148.558	6.14366	0.656022	-0.188945	149.001	5.75817	7.41243	-0.12296	176.109	33.6913	7.00797e-07	-0.479493	148.794	6.37622	0.734975	-0.185967	186.23	45.2646	0.000309339	-0.366503	176.126	33.694	14.0373	-0.104707	148.552	6.13639	0.653498	-0.189046
Conventional hybrids	0.086	269.521	432.794	457.356	0.31882	251.603	359.095	143.781	0.105985	263.964	460.999	439.308	0.14656	153.365	141.774	11.2894	0.0188334	251.318	342.174	139.962	0.105025	145.162	151.294	80.6561	0.0855516	230.218	236.021	98.5707	0.0925982	251.201	354.499	141.402	0.10539
Plug-in and battery electric	1.634	12.5939	40.3409	53.0726	0.118824	88.0929	149.372	325.848	0.18737	74.8019	68.7072	96.8395	0.141792	157.031	292.169	317.032	0.18632	88.147	159.524	347.011	0.189782	156.893	332.694	454.798	0.200209	81.9249	253.267	394.952	0.194759	88.5001	148.76	324.573	0.187219
Fuel cell	0	0	6.2335e-05	0.00011268	-	0.0378217	25.3629	112.935	-	0.533471	5.0809	39.7767	-	1.78931	72.3441	254.91	-	0.0317888	31.8971	95.5115	-	0.0159032	10.7317	47.7819	-	0.0255938	16.9932	75.6656	-	0.0390016	30.5792	116.592	-
CO2 EMISSIONS AND CAPTURE FROM ENERGY SYSTEM AND INDUSTRIAL PROCESSES
CO2 emissions (Mt/yr.)18	37.7655	31.8195	28.0104	25.6681	-0.0123791	24.2317	13.967	-1.45263e-05	-1.62096	24.2324	14.1335	-0.0369616	-1.79969	19.1691	11.574	1.61855e-05	-0.376866	24.2317	13.967	3.2478e-06	-0.408329	24.2317	13.967	2.54111e-06	-0.412994	24.2317	13.967	-3.68111e-05	-1.63987	24.2317	13.967	-3.09245e-06	-1.59074
Power generation16	3.36087	3.3783	4.51004	5.489	0.01595	2.31852	1.75853	-0.839477	-1.95624	2.94939	3.24906	-0.4968	-1.94019	2.32639	1.76472	-0.595818	-1.94572	2.31852	1.7586	-0.831366	-1.95594	2.31852	1.75853	-0.836147	-1.95612	2.65636	1.43831	-1.05839	-1.96341	2.31852	1.75856	-0.944018	-1.95987
Industry17	6.79386	6.42323	6.19643	5.91538	-0.00445665	4.36239	3.37939	2.55741	-0.0310254	5.41912	4.70884	1.70132	-0.0436823	4.35421	3.36738	2.14498	-0.0365069	4.36236	3.37997	2.55724	-0.0310275	4.36253	3.37974	2.50473	-0.0316759	4.98135	4.06603	1.75057	-0.0428016	4.36252	3.37847	2.55908	-0.031005
Services and agriculture17	4.10467	3.87571	3.34548	2.90131	-0.01113	1.54323	0.645782	0	-1	1.63158	0.917292	0.455446	-0.0684661	1.46955	0.681301	0	-1	1.54682	0.684089	0	-1	1.53624	0.682079	0	-1	1.78383	1.1554	0.306322	-0.080309	1.54856	0.645857	0	-1
Residential17	7.73522	5.96028	4.80348	3.78443	-0.022797	5.45971	2.0259	0	-1	4.34139	2.14564	0.581321	-0.0801011	2.84289	2.0259	0	-1	5.5285	2.0259	0	-1	5.2975	2.0259	0	-1	5.26501	2.83127	0.61409	-0.0784724	5.29547	2.0259	0	-1
Transport	15.7709	12.1819	9.15492	7.57801	-0.0233652	10.0335	5.55787	0.158058	-0.137985	9.86201	3.06868	0.088078	-0.154092	8.17602	3.76724	0.410766	-0.111014	10.0246	5.66752	0.271785	-0.12278	10.2026	5.60644	0.1202	-0.145565	9.54513	4.47595	0.504354	-0.105109	10.1923	5.24531	0.155652	-0.138411
Domestic hydrogen production	0	2.9374e-06	8.8565e-06	8.6122e-06	-	0.514298	0.599498	-1.54707	-	0.0289014	0.0478711	-2.06642	-	0	0	-1.51863	-	0.450916	0.450916	-1.6862	-	0.514298	0.514298	-1.5441	-	8.95901e-06	1.05176e-07	-2.02289	-	0.514298	0.91288	-1.40884	-
Domestic biofuel production	0	0	0	0	-	0	-4.15585e-06	-0.236134	-	0	-0.00299858	-0.1825	-	0	-0.032586	-0.425421	-	0	0	-0.220683	-	0	0	-0.244681	-	0	-1.0277e-05	-2.42533e-05	-	0	-3.55088e-06	-0.265173	-
Direct air capture	0	0	0	0	-	0	-2.77926e-07	-0.0928051	-	0	-0.000914974	-0.1174	-	0	-3.43205e-10	-0.0158688	-	0	0	-0.0907788	-	0	0	-7.7452e-08	-	0	-7.17297e-07	-0.094066	-	0	-2.92131e-07	-0.0967046	-
CO2 captured (Mt/yr.)	0	0	0	0	-	0	-1.92126	-8.61947	-	0	-0.035556	-8.25058	-	0	-1.2705	-7.43506	-	0	-1.94873	-8.37382	-	0	-1.91222	-8.22745	-	0	-1.85996	-8.72288	-	0	-1.82209	-8.79492	-
Power generation16	0	0	0	0	-	0	-0.582988	-3.20416	-	0	-0.0242895	-3.681	-	0	-0.584915	-2.96898	-	0	-0.582922	-3.19605	-	0	-0.582985	-3.20083	-	0	-1.58416	-3.96175	-	0	-0.582958	-3.3087	-
Industry17	0	0	0	0	-	0	-1.33827	-2.68703	-	0	-0.00638331	-2.14972	-	0	-0.653003	-2.50617	-	0	-1.3658	-2.68643	-	0	-1.32923	-2.67477	-	0	-0.275777	-2.09407	-	0	-1.20937	-2.68686	-
Domestic hydrogen production	0	0	0	0	-	0	-2.69235e-06	-2.39935	-	0	-0.000969612	-2.11995	-	0	0	-1.51863	-	0	0	-2.17988	-	0	0	-2.10717	-	0	-9.87592e-06	-2.57297	-	0	-0.0297581	-2.43749	-
Domestic biofuel production	0	0	0	0	-	0	-4.15585e-06	-0.236134	-	0	-0.00299858	-0.1825	-	0	-0.032586	-0.425421	-	0	0	-0.220683	-	0	0	-0.244681	-	0	-1.0277e-05	-2.42533e-05	-	0	-3.55088e-06	-0.265173	-
Direct air capture	0	0	0	0	-	0	-2.77926e-07	-0.0928051	-	0	-0.000914974	-0.1174	-	0	-3.43205e-10	-0.0158688	-	0	0	-0.0907788	-	0	0	-7.7452e-08	-	0	-7.17297e-07	-0.094066	-	0	-2.92131e-07	-0.0967046	-
DIRECT POLICY COSTS
Undiscounted policy costs (BCHF2010)						1.77068	4.67721	15.3059	-	5.01995	11.3087	40.0183	-	8.12994	9.53871	27.2742	-	1.30786	3.38471	12.6169	-	0.945354	1.92294	9.94284	-	0.945354	1.92294	9.94284	-	2.40432	5.38496	15.1762	-
Invesmtent costs						5.32841	8.01306	16.0543	-	8.84211	13.7977	38.4032	-	13.1524	15.1393	29.2077	-	4.93819	6.60071	12.1912	-	4.29492	5.11854	8.69296	-	4.29492	5.11854	8.69296	-	5.94309	8.98464	15.7504	-
Operating costs (other than fuel cost)						0.0928358	0.980382	2.08179	-	-0.0704589	0.49562	0.97465	-	0.545108	1.9	5.43661	-	0.111464	0.891645	1.75153	-	0.0392562	0.559849	1.83509	-	0.0392562	0.559849	1.83509	-	0.135895	0.844139	1.94333	-
Fuel costs						-3.65056	-4.31623	-2.8302	-	-3.7517	-2.98461	0.64049	-	-5.56758	-7.50058	-7.37014	-	-3.74179	-4.10764	-1.32591	-	-3.38882	-3.75545	-0.585215	-	-3.38882	-3.75545	-0.585215	-	-3.67467	-4.44382	-2.51759	-
Discounted policy costs @2.5% social discount rate (BCHF2010)						1.38747	2.82042	7.75905	-	3.93354	6.81926	20.2866	-	6.37047	5.75196	13.8262	-	1.02481	2.04102	6.3959	-	0.740761	1.15956	5.04035	-	0.740761	1.15956	5.04035	-	1.88398	3.2472	7.69329	-
CAPEX						4.17524	4.83197	8.13844	-	6.92851	8.32016	19.4678	-	10.306	9.12918	14.8063	-	3.86947	3.98031	6.18014	-	3.36542	3.08654	4.40675	-	3.36542	3.08654	4.40675	-	4.65689	5.41785	7.9844	-
OPEX (other than fuel cost)						0.0727444	0.591182	1.05533	-	-0.0552102	0.298865	0.494082	-	0.427136	1.14572	2.756	-	0.0873413	0.537673	0.887909	-	0.0307604	0.337596	0.930267	-	0.0307604	0.337596	0.930267	-	0.106485	0.509026	0.985138	-
Fuel costs						-2.86051	-2.60274	-1.43472	-	-2.93976	-1.79976	0.324685	-	-4.36265	-4.52294	-3.73617	-	-2.932	-2.47696	-0.672146	-	-2.65542	-2.26458	-0.296664	-	-2.65542	-2.26458	-0.296664	-	-2.8794	-2.67968	-1.27625	-
Cumulative policy costs undiscounted 2020-2050 (BCHF2010)						162.523				425.585				353.945				128.419				97.1365	0	0	0	119.566	0	0	0	176.637	0	0	0
Cumulative policy costs discounted @2.5% 2020-2050 (BCHF2010)						97.4062				257.156				220.09				76.664				58.9548	0	0	0	68.8956	0	0	0	107.873	0	0	0
Annual per capita cost undiscounted 2020-2050 (BCHF2010/yr.)						183.895	457.399	1435.85	-	521.348	1105.91	3754.13	-	844.336	932.819	2558.6	-	135.828	331.001	1183.59	-	98.1799	188.05	932.74	-	102.157	313.869	1195.76	-	238.131	517.833	1446.78	-
INDICATORS
Primary energy consumption per capita (GJ/yr.)	120.734	99.283	81.9962	70.8565	-0.0170445	94.5837	74.7036	63.0623	-0.0206479	88.8665	69.7172	55.3101	-0.0248317	87.8965	70.8973	70.8821	-0.0168386	94.8556	75.6967	64.5079	-0.0199312	94.4119	73.5472	62.5516	-0.0209002	93.9384	73.3585	61.9176	-0.0212352	86.2097	68.1079	63.3419	-0.0205095
- Relative to 2000 (Index 2000=100)	86.0072	70.726	58.4115	50.4759	-0.0170445	67.3784	53.2164	44.9235	-0.0206479	63.3056	49.6643	39.4011	-0.0248317	62.6146	50.5049	50.4942	-0.0168386	67.5721	53.9239	45.9534	-0.0199312	67.256	52.3926	44.5597	-0.0209002	66.9187	52.2582	44.1081	-0.0212352	61.413	48.5179	45.1227	-0.0205095
Final energy consumption per capita (GJ/yr.)	87.3178	74.9215	66.5236	60.9962	-0.0115057	69.2288	57.7295	48.7583	-0.0186205	65.258	54.2782	45.7822	-0.0206124	62.253	53.0203	46.0189	-0.0204494	69.4353	58.3133	49.3827	-0.0182176	69.4899	57.4037	48.4204	-0.0188407	69.101	57.4962	49.2289	-0.0183164	68.3058	56.6409	48.683	-0.0186695
- Relative to 2000 (Index 2000=100)	80.1081	68.7353	61.0308	55.9598	-0.0115057	63.5127	52.9629	44.7324	-0.0186205	59.8697	49.7965	42.002	-0.0206124	57.1129	48.6425	42.2192	-0.0204494	63.7021	53.4985	45.3053	-0.0182176	63.7522	52.664	44.4224	-0.0188407	63.3954	52.7488	45.1642	-0.0183164	62.6659	51.9641	44.6633	-0.0186695
Electricity consumption per capita (kWh/yr.)	6647.83	6650.85	6512.46	6351.1	-0.00147188	6886.34	6740.16	6499.23	-0.00072896	6537.32	6387.71	6190.06	-0.00229878	6871.07	6646.53	6267.48	-0.00189867	6900.36	6808.14	6613.33	-0.000167789	6918.6	6767.98	6620.06	-0.000135006	6870.38	6711.89	6581.98	-0.000321054	6755.26	6580.59	6480.21	-0.000823431
- Relative to 2000 (Index 2000=100)	90.9343	90.9756	89.0826	86.8754	-0.00147188	94.1969	92.1973	88.9017	-0.00072896	89.4228	87.3762	84.6727	-0.00229878	93.988	90.9166	85.7317	-0.00189867	94.3887	93.1272	90.4625	-0.000167789	94.6382	92.5778	90.5545	-0.000135006	93.9786	91.8106	90.0336	-0.000321054	92.4038	90.0147	88.6415	-0.000823431
CO2 emissions per capita (t/yr.)	4.38935	3.37825	2.80026	2.46159	-0.0184842	2.57266	1.39631	-1.39309e-06	-1.61713	2.57274	1.41295	-0.00354464	-1.79475	2.03517	1.15707	1.5522e-06	-0.380718	2.57266	1.39631	3.11466e-07	-0.411986	2.57266	1.39631	2.43694e-07	-0.416622	2.57267	1.39631	-3.53021e-06	-1.63592	2.57266	1.39631	-2.96569e-07	-1.58708
- Relative to 1990 (Index 1990=100)	66.4963	51.1788	42.4224	37.2918	-0.0184842	38.9745	21.1533	-2.11045e-05	-1.61713	38.9757	21.4055	-0.0536995	-1.79475	30.8317	17.5291	2.35151e-05	-0.380718	38.9745	21.1534	4.71855e-06	-0.411986	38.9745	21.1534	3.69184e-06	-0.416622	38.9745	21.1533	-5.34809e-05	-1.63592	38.9745	21.1534	-4.49286e-06	-1.58708
Primary energy consumption per unit of GDP (MJ/CHF2010)	1.46326	1.13996	0.889468	0.722335	-0.0225147	1.08601	0.810359	0.642878	-0.0260981	1.02036	0.756269	0.56385	-0.0302585	1.00922	0.76907	0.722597	-0.02231	1.08913	0.821132	0.657616	-0.0253854	1.08403	0.797815	0.637672	-0.026349	1.0786	0.795768	0.631209	-0.0266821	0.989856	0.738812	0.645729	-0.0259605
- Relative to 2000 (Index 2000=100)	28.0002	21.8137	17.0204	13.8222	-0.0225147	20.7812	15.5066	12.3018	-0.0260981	19.5251	14.4716	10.7895	-0.0302585	19.312	14.7165	13.8272	-0.02231	20.841	15.7127	12.5838	-0.0253854	20.7435	15.2666	12.2022	-0.026349	20.6395	15.2274	12.0785	-0.0266821	18.9414	14.1375	12.3563	-0.0259605
Final energy consumption per unit of GDP (MJ/CHF2010)	1.05827	0.860245	0.721625	0.621816	-0.0170067	0.794882	0.62623	0.497059	-0.024082	0.749289	0.588791	0.466719	-0.0260627	0.714787	0.575146	0.469133	-0.0259007	0.797253	0.632564	0.503425	-0.0236813	0.79788	0.622696	0.493614	-0.0243009	0.793415	0.6237	0.501857	-0.0237796	0.784285	0.614421	0.496292	-0.0241306
- Relative to 2000 (Index 2000=100)	70.9853	57.7026	48.4044	41.7095	-0.0170067	53.3183	42.0056	33.3412	-0.024082	50.26	39.4943	31.3061	-0.0260627	47.9457	38.5791	31.468	-0.0259007	53.4773	42.4304	33.7682	-0.0236813	53.5194	41.7686	33.1101	-0.0243009	53.2198	41.8359	33.663	-0.0237796	52.6074	41.2135	33.2897	-0.0241306
Electricity consumption per unit of GDP (MWh/MCHF2010)	80.5696	62.6437	65.1427	66.2258	-0.00630431	64.8618	67.4203	67.7704	-0.00556498	61.5744	63.8948	64.5466	-0.00712721	64.718	66.4838	65.3539	-0.00672903	64.9938	68.1003	68.9602	-0.00500653	65.1657	67.6986	69.0303	-0.0049739	64.7115	67.1375	68.6333	-0.00515905	63.6271	65.8242	67.5721	-0.005659
- Relative to 2000 (Index 2000=100)	80.3943	62.5073	65.0009	66.0816	-0.00630431	64.7206	67.2736	67.6229	-0.00556498	61.4404	63.7557	64.4061	-0.00712721	64.5771	66.339	65.2116	-0.00672903	64.8524	67.9521	68.8101	-0.00500653	65.0238	67.5512	68.8801	-0.0049739	64.5706	66.9914	68.4839	-0.00515905	63.4886	65.6809	67.425	-0.005659
CO2 emissions per capita per unit of GDP (kt/MCHF2010)	53.1976	38.789	30.3763	25.0943	-0.0239464	29.5392	15.1467	-1.42016e-05	-1.61369	29.5401	15.3273	-0.0361353	-1.79033	23.3677	12.5515	1.58237e-05	-0.384164	29.5392	15.1467	3.17519e-06	-0.415259	29.5392	15.1467	2.4843e-06	-0.419869	29.5392	15.1467	-3.59882e-05	-1.63238	29.5392	15.1467	-3.02332e-06	-1.58382
- Relative to 1990 (Index 1990=100)	56.0869	40.8957	32.0261	26.4573	-0.0239464	31.1436	15.9693	-1.49729e-05	-1.61369	31.1445	16.1597	-0.0380979	-1.79033	24.6369	13.2333	1.66831e-05	-0.384164	31.1436	15.9694	3.34765e-06	-0.415259	31.1436	15.9694	2.61923e-06	-0.419869	31.1436	15.9693	-3.79428e-05	-1.63238	31.1436	15.9694	-3.18753e-06	-1.58382
Import dependency	0.724982	0.656116	0.576564	0.491542	-0.0124572	0.568383	0.386758	0.171465	-0.0455263	0.594165	0.411986	0.208558	-0.0394296	0.495484	0.27537	0.00562512	-0.145242	0.552482	0.374205	0.194389	-0.0416552	0.569124	0.388495	0.196859	-0.041269	0.573295	0.39625	0.175174	-0.0448585	0.516307	0.30652	0.17053	-0.0456932
SEASONAL BALANCING OF ELECTRICITY TWh/yr.
Winter (01 Dec - 28 Feb)	16.0801	20.4477	20.8765	20.7276	0.00822344	21.2349	21.3818	21.1973	0.00895248
Hydropower (excluding pump hydro)	7.22431	7.56436	7.57037	7.7604	0.00231176	7.71913	7.76049	8.01999	0.00337618
Nuclear power plants	6.71156	5.31487	2.2973	0	-1	5.25148	2.29187	0	-1
Other thermal power plants (incl. CHPs , fuel cells and Geothermal)	1.45661	2.278	3.32898	4.1743	0.0345457	1.934	2.36809	3.06419	0.0242794
Wind Turbines and Solar PV		0.521846	0.888344	1.44702	-	1.03585	2.43992	4.39331	-
Electric storages (including pump storage) (output minus input)	-0.96506	-0.0358603	-0.0857814	-0.0969875	-0.0714364	-0.0381914	-0.0764777	-0.0400928	-0.0975236
Input to Electrolysis	0	0	-3.41058e-07	-3.85077e-07	-	-0.0251281	-0.0935374	-0.0860057	-
Net Imports of electricity	1.65267	4.8045	6.87726	7.44286	0.0497416	5.35775	6.6914	5.8459	0.0415951
Spring (01 Mar - 31 May)	14.3815	16.8327	17.5482	17.5873	0.00651265	17.5346	18.0402	17.5243	0.00639616
Hydropower (excluding pump hydro)	6.21169	5.92125	5.90192	6.06607	-0.000764912	6.06322	6.04007	6.56032	0.00176309
Nuclear power plants	6.672	5.2678	2.16365	0	-1	5.23401	2.13261	0	-1
Other thermal power plants (incl. CHPs , fuel cells and Geothermal)	1.472	1.97577	2.73772	3.74429	0.0305745	1.58137	1.88887	2.63892	0.019009
Wind Turbines and Solar PV		1.28898	2.19674	3.57826	-	2.39519	5.25174	9.12167	-
Electric storages (including pump storage) (output minus input)	-0.2062	-0.0505196	-0.0896997	-0.112712	-0.0192956	-0.0857602	-0.160198	-0.158578	-0.00843518
Input to Electrolysis	0	0	-4.22775e-07	-4.34071e-07	-	-0.073911	-0.340892	-0.217235	-
Net Imports of electricity	0.232	2.42946	4.63784	4.31143	0.0988535	2.42044	3.228	-0.420749	-2.01939
Summer (01 Jun - 31 Aug)	11.7095	13.9399	14.5483	14.9007	0.00780481	14.2255	14.8897	15.344	0.00875838
Hydropower (excluding pump hydro)	11.8279	11.7559	11.7656	12.0729	0.000661623	12.0062	12.077	12.1904	0.000974383
Nuclear power plants	4.92	3.38498	1.33284	0	-1	3.39652	1.33284	0	-1
Other thermal power plants (incl. CHPs , fuel cells and Geothermal)	1.663	1.17999	1.63403	1.8498	0.00343995	1.08654	1.3203	1.6138	-0.000968219
Wind Turbines and Solar PV		1.64101	2.79824	4.55803	-	2.94712	6.20135	10.5309	-
Electric storages (including pump storage) (output minus input)	-0.2734	-0.739249	-0.639411	-0.622074	0.0268749	-0.702269	-0.618435	-0.890123	0.0388125
Input to Electrolysis	0	0	-5.04847e-07	-7.45771e-07	-	-0.504343	-1.40555	-7.00654	-
Net Imports of electricity	-6.428	-3.2827	-2.34292	-2.95796	-0.0247267	-4.00424	-4.01781	-1.09444	-0.05551
Autumn (01 Sep - 30 Nov)	17.7265	16.8017	17.3715	17.6558	-0.000129038	17.4107	17.9899	17.722	-8.19243e-06
Hydropower (excluding pump hydro)	11.2031	11.4631	11.4942	11.6877	0.0013667	11.612	11.7094	10.8163	-0.00113295
Nuclear power plants	6.977	4.85836	1.9849	0	-1	4.94399	2.02137	0	-1
Other thermal power plants (incl. CHPs , fuel cells and Geothermal)	1.467	1.69753	2.61989	3.4023	0.027508	1.45075	1.81928	2.12224	0.0119826
Wind Turbines and Solar PV		0.870181	1.48308	2.41578	-	1.61181	3.52095	6.10336	-
Electric storages (including pump storage) (output minus input)	-0.2056	-0.0311926	-0.0519143	-0.0672256	-0.0354182	-0.0471526	-0.0634287	-0.0717052	-0.0334088
Input to Electrolysis	0	0	-4.43547e-07	-4.58764e-07	-	-0.504446	-1.24712	-1.24814	-
Net Imports of electricity	-1.715	-2.05632	-0.158578	0.217265	-1.93553	-1.65626	0.229457	1.39587e-06	-1.63616
Notes
1 Waste consumption in 2019 is adjusted to include use of waste for biogas production which is not reported in statistics, in order to be compatible with STEM accounting
2 Imports of oil products exclude those quantities that are consumed in international aviation
3 Includes CHPs for district heating and on-site CHPs in industry, services and residential sectors
4 In STEM natural gas and biomethane are blended into the gas grid
5 Centralised boilers and heat pumps that are used for heat production in district heating networks
6 Assumed 80% roundtrip efficiency in the future years
7 e-gas refers to natural gas produced by hydrogen methanation
8 e-liquids refers to gasoline and diesel produced by hydrogen Fischer Tropsch
9 Excluding international aviation and fuel consumption in on-site CHPs in industry, services and residential sectors
10 In projection years also includes on-site heat consumption from distributed CHPs in industry, services and residential sectors
11 Excluding consumption of gas in pipeline compressors
12 Refers to imported e-liquids which are considered of zero-carbon (domestic e-fuels are included in the consumption of natural gas and oil products)
13 Does not consider waste consumption in on-site industrial CHP plants
14 Values for 2019 are estimations; includes area for offices and production spaces and excludes non-used area
15 Excludes buildings with partial residential use
16 Excludes emissions from on-site distributed CHP plants in industry, residential and services sectors
17 Includes emissions from on-site distributed CHP plants in industry, residential and services sectors
18 CO2 emissions for 2019 is estimation
19 For hydropower production utilisation rates STEM considers a 10-year average
20 Excluding fuels for hydrogen production
21 Excluding hydrogen production
